# Supplementary material for: Visible-light-induced aerobic epoxidation with vitamin B2-based photocatalyst
Source: Royal Society of Chemistry journal article supplement (doi:10.1039/d3ob00663h), 2023-01-01
Supplement: d3ob00663h1.pdf [file d3ob00663h1.pdf]

## Electronic Supplementary Information

### Visible-light-induced Aerobic Epoxidation with Vitamin B2-based Photocatalyst

Duyi Shen,<sup>\*[a]</sup> Ting Ren,<sup>[a]</sup> Zhen Luo,<sup>[a]</sup> Feiyang Sun,<sup>[a]</sup> Yun Han,<sup>[a]</sup> Kaihui Chen,<sup>[a]</sup>

Xuan Zhang,<sup>[a]</sup> Mengxin Zhou,<sup>[a]</sup> Peiwei Gong,<sup>[a]</sup> and Mianran Chao<sup>\*[a]</sup>

[a] Key Laboratory of Green Natural Products and Pharmaceutical Intermediates in  
Universities of Shandong Province, School of Chemistry and Chemical Engineering,  
Qufu Normal University, Qufu 273165, P. R. China

Corresponding Authors:

\* Duyi Shen (shendy@qfnu.edu.cn)

\* Mianran Chao (chaomr@qfnu.edu.cn)

---

## Table of Contents

|                                                                                                   |            |
|---------------------------------------------------------------------------------------------------|------------|
| <b>1. General Information.....</b>                                                                | <b>S1</b>  |
| <b>2. Experimental Section.....</b>                                                               | <b>S2</b>  |
| <b>3. Table S1.....</b>                                                                           | <b>S4</b>  |
| <b>4. Table S2.....</b>                                                                           | <b>S5</b>  |
| <b>5. GC-MS Spectra of <sup>18</sup>O- Labelling Experiment.....</b>                              | <b>S6</b>  |
| <b>6. Characterization Data of Isolated Products.....</b>                                         | <b>S7</b>  |
| <b>7. <sup>1</sup>H, <sup>13</sup>C, and <sup>19</sup>F NMR Spectra of Isolated Products.....</b> | <b>S17</b> |
| <b>8. Supplementary Information of Reaction Scope.....</b>                                        | <b>S73</b> |
| <b>9. References.....</b>                                                                         | <b>S74</b> |

## 1. General Information

$^1\text{H}$ -NMR,  $^{13}\text{C}$ -NMR and  $^{19}\text{F}$ -NMR were recorded on a BRUKER AVANCE at 500, 126 and 471 MHz, respectively. Chemical shifts ( $\delta$ ) were reported referenced to an internal tetramethylsilane standard or the  $\text{CDCl}_3$  residual peak ( $\delta$  7.26) for  $^1\text{H}$ -NMR. Chemical shifts of  $^{13}\text{C}$ -NMR were reported relative to  $\text{CDCl}_3$  ( $\delta$  77.0). Data were reported in the following order: chemical shift ( $\delta$ ) in ppm; multiplicities were indicated s (singlet), bs (broad singlet), d (doublet), t (triplet), m (multiplet); coupling constants (J) were in Hz. MS spectra were analyzed by Agilent G6460A LC-MS (ESI) and Agilent 7890/7000D GC-MS (EI, 70eV). UV-vis spectra were collected with an Agilent Cary 8454 diode array spectrophotometer. Analytical thin-layer chromatography (TLC) was performed on silica gel and visualized with UV light. Purification of reaction products was carried out by flash chromatography on silica gel (200–300 mesh). The photocatalytic reactions were performed with a multi-station reactor purchased from Shanghai Taitan Science Co. Ltd. (China). And the temperature and irradiation power could be set and well-controlled by the reactor (model: PR-6, see pictures below). The substrates could be easily prepared with reported methods by the reaction of corresponding ketones and aldehydes in EtOH- $\text{H}_2\text{O}$  in the presence of NaOH. In addition, most of the solid substrates could be recrystallized with EtOAc/petroleum ether system. All the substrates and products (except **b15**, **b23** and **b24**) were known compounds and the characterizations were consistent with that in the literature.  $^{18}\text{O}_2$  (98 atom%  $^{18}\text{O}$ ) was brought from Guangzhou Yigas Gases Co., Ltd. (P. R. China). Unless otherwise noted, other commercially available compounds and solvents with analytical grade were purchased from Energy Chemical Co., Ltd. (P. R. China) and used without further purification.

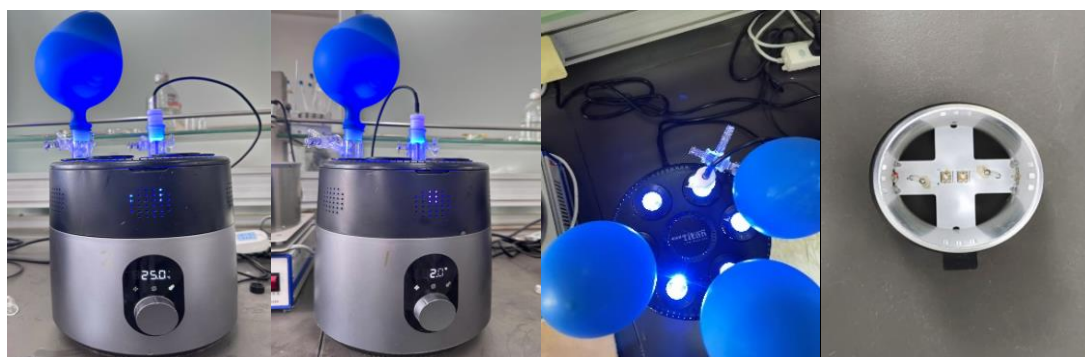

## 2. Experimental Section

**Typical experimental procedure of photocatalytic epoxidation.** In a 10 mL of Schlenk tube equipped with a magnetic stirring bar, the substrates (**a1-a26**, 0.25 mmol), RFT (3 mol%), DBU (2.5 equiv.) and MeOH (2 mL) were added. Having been charged with an air balloon (atmospheric pressure), then the reaction tube was irradiated under a 2 W blue LED (450 nm) with continuous stirring at room temperature for 3 h. After completion, the reaction mixture was purified by chromatography column on silica gel with EtOAc/petroleum ether to get the desired products.

**Procedure of sunlight-driven and gram-scale reaction.** The substrates **a1** (5.0 mmol, 1.04 g), RFT (5 mol%: 3 mol% for the 1<sup>st</sup> day and 2 mol% for the 2<sup>nd</sup> day), DBU (3.5 equiv.: 2.5 equiv. for the 1<sup>st</sup> day and 1.0 equiv. for the 2<sup>nd</sup> day) and MeOH (45 mL) were added into a round bottom flask equipped with a magnetic stirring bar. Then the reaction mixture was open to air and irradiated by sunlight with continuous stirring at room temperature for ca. 2 daytimes. After completion, the reaction mixture was purified by chromatography column on silica gel with EtOAc/petroleum ether to get the desired products (0.639 g, 57% yield).

Note: In the case of large-scale experiment, the catalyst and organic base were firstly added to the reaction mixture just as the same ratio as the small-scale experiment. After one day reaction, certain amounts of substrate were still there and not converted by TLC. Therefore, another batch of catalyst and organic base were added to the reaction, and the conversion looked much better after the second day.

### **Procedure of control experiments:**

(a) Blank experiments: Following the above typical procedure of photocatalytic reaction, the blank experiments were carried out in the absence of RF, base, light, or dioxygen, respectively. After the defined reaction time, the same work-up of typical reaction was conducted to detect or isolate the desired products.

(b) With additives: Following the typical procedure of photocatalytic reaction, excess amounts of TEMPO, TEMP, DABCO or tBuBnNO were additionally added to the reaction mixture, respectively. After the defined time, the same work-up of typical reaction was conducted to detect or isolate the products.

(c)  $^{18}\text{O}$ -isotopical labelling experiment: Following the typical procedure of photocatalytic reaction, on one hand, the Schlenk tube was charged with  $^{18}\text{O}$ -dioxygen rather than air. After the defined time, the reaction mixture was diluted with anhydrous MeCN and injected to mass spectrometer for mass analysis of the epoxides.

**3. Table S1.** The supplementary data for the optimization of reaction conditions.

Reaction scheme: **a1** (trans-stilbene)  $\xrightarrow[\text{blue LED (2 W, 450 nm), air balloon, RT, 3 h}]{\text{photocatalyst, DBU, solvent}}$  **b1** (1,2-diphenylethane-1,2-diol)

| entry    | photocatalysts (mol%) | DBU (equiv.)     | solvent                         | yield (%) |
|----------|-----------------------|------------------|---------------------------------|-----------|
| 1        | RF (5%)               | DBU (2.0)        | MeOH                            | 60        |
| 2        | RF (5%)               | DBU (2.5)        | MeOH                            | 74        |
| 3        | RF (5%)               | DBU (3.0)        | MeOH                            | 70        |
| 4        | RF (3%)               | DBU (2.5)        | MeOH                            | 73        |
| 5        | RF (1%)               | DBU (2.5)        | MeOH                            | 42        |
| <b>6</b> | <b>RFT (3%)</b>       | <b>DBU (2.5)</b> | <b>MeOH</b>                     | <b>75</b> |
| 7        | RFT (3%)              | DBU (2.5)        | EtOH                            | 68        |
| 8        | RFT (3%)              | DBU (2.5)        | TFE                             | 10        |
| 9        | RFT (3%)              | DBU (2.5)        | MeCN                            | 45        |
| 10       | RFT (3%)              | DBU (2.5)        | EtOAc                           | trace     |
| 11       | RFT (3%)              | DBU (2.5)        | CH <sub>2</sub> Cl <sub>2</sub> | trace     |
| 12       | RFT (3%)              | DBU (2.5)        | THF                             | 24        |
| 13       | RFT (3%)              | DBU (2.5)        | dioxane                         | 12        |

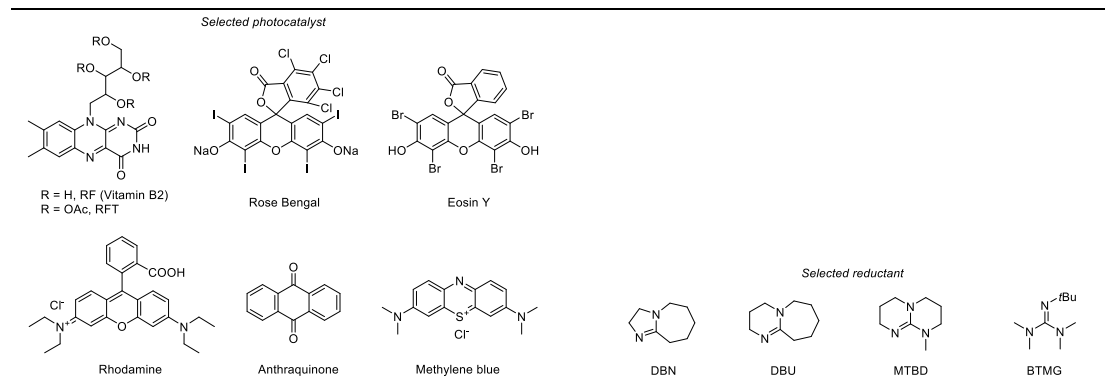

<sup>a</sup>Unless otherwise stated, the reaction conditions were: **a1** (0.25 mmol), photocatalyst (1-5 mol%), reductant/base (2.0-3.0 equiv.) and solvent (2 mL) were mixed and stirred in a glass tube equipped with an air balloon under visible-light irradiation at room temperature. The products were shown with isolated yields.

**4. Table S2.** Results of blank experiments.

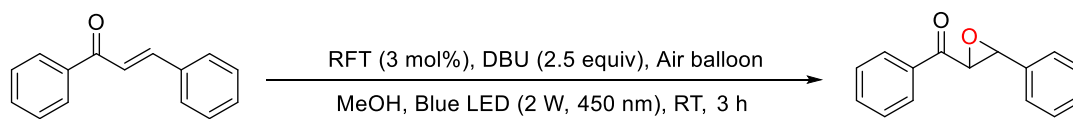

| entry | RFT | DBU | air | light | remarks     |
|-------|-----|-----|-----|-------|-------------|
| 1     | no  | yes | yes | yes   | no reaction |
| 2     | yes | no  | yes | yes   | no reaction |
| 3     | yes | yes | no  | yes   | no reaction |
| 4     | yes | yes | yes | no    | no reaction |

## 5. GC-MS Spectra of $^{18}\text{O}$ -Labelling Experiment

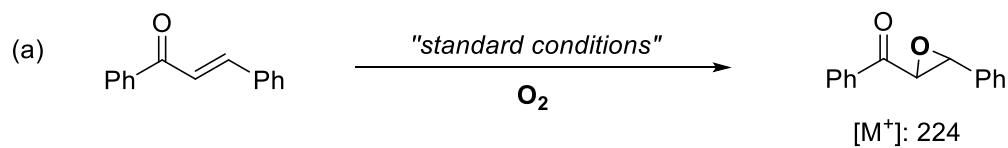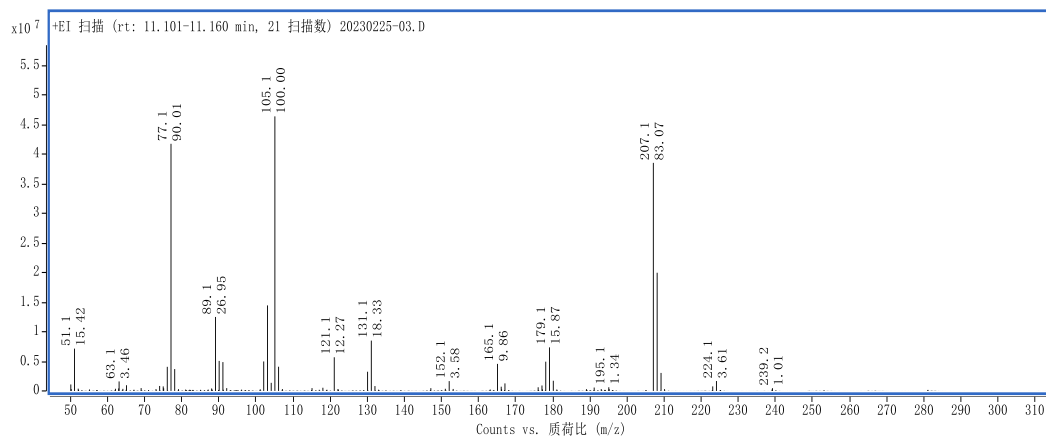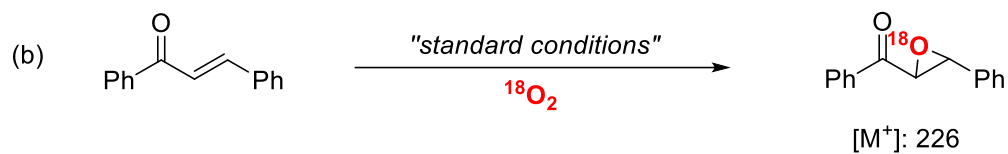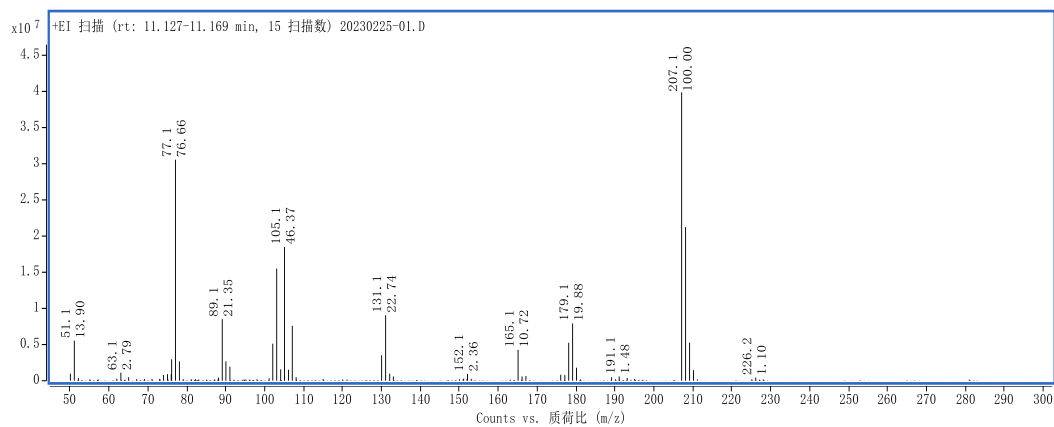



## 6. Characterization data of isolated products

phenyl(3-phenyloxiran-2-yl)methanone (**b1**)<sup>1</sup>: Following the general procedure, the title product was isolated by column chromatography (EtOAc/petroleum ether, v/v = 1: 79). White solid (42.5 mg, 76% yield). <sup>1</sup>H NMR (500 MHz, Chloroform-*d*) δ 8.04–7.99 (m, 2H), 7.65–7.60 (m, 1H), 7.49 (t, *J* = 7.8 Hz, 2H), 7.39 (tdd, *J* = 7.3, 4.6, 1.6 Hz, 5H), 4.30 (d, *J* = 1.8 Hz, 1H), 4.08 (d, *J* = 1.8 Hz, 1H). <sup>13</sup>C{<sup>1</sup>H} NMR (126 MHz, Chloroform-*d*) δ 193.1, 135.5, 134.0, 129.0, 128.9, 128.8, 128.3, 125.8, 61.0, 59.4.

(4-methoxyphenyl)(3-phenyloxiran-2-yl)methanone (**b2**)<sup>1</sup>: Following the general procedure, the title product was isolated by column chromatography (EtOAc/petroleum ether, v/v = 1: 79). Orange solid (52.1 mg, 82% yield). <sup>1</sup>H NMR (500 MHz, Chloroform-*d*) δ 7.81 (d, *J* = 7.7 Hz, 2H), 7.47 (t, *J* = 7.4 Hz, 1H), 7.31 (t, *J* = 7.7 Hz, 2H), 7.22 (d, *J* = 8.3 Hz, 2H), 6.83 (d, *J* = 8.3 Hz, 2H), 4.58–4.53 (m, 1H), 3.84–3.80 (m, 1H), 3.78 (s, 3H). <sup>13</sup>C{<sup>1</sup>H} NMR (126 MHz, Chloroform-*d*) δ 199.21, 158.72, 135.68, 133.59, 133.38, 128.85, 128.56, 128.52, 114.05, 55.29, 48.05, 47.81.

(3-phenyloxiran-2-yl)(*p*-tolyl)methanone (**b3**)<sup>1</sup>: Following the general procedure, the title product was isolated by column chromatography (EtOAc/petroleum ether, v/v = 1: 79). White solid (51.2 mg, 86% yield). <sup>1</sup>H NMR (500 MHz, Chloroform-*d*) δ 7.94–7.89 (m, 2H), 7.38 (tdd, *J* = 8.1, 6.3, 3.4 Hz, 5H), 7.27 (d, *J* = 8.0 Hz, 2H), 4.27 (d, *J* = 1.9 Hz, 1H), 4.06 (d, *J* = 1.9 Hz, 1H), 2.42 (s, 3H). <sup>13</sup>C{<sup>1</sup>H} NMR (126 MHz, Chloroform-*d*) δ 192.59, 145.09, 135.64, 133.06, 129.59, 129.02, 128.77, 128.50, 125.82, 60.94,

59.33, 21.82.

(4-fluorophenyl)(3-phenyloxiran-2-yl)methanone (**b4**)<sup>2</sup>: Following the general procedure, the title product was isolated by column chromatography (EtOAc/petroleum ether, v/v = 1: 79). White solid (36.3 mg, 60% yield). <sup>1</sup>H NMR (500 MHz, Chloroform-*d*) δ 8.10–8.03 (m, 2H), 7.44–7.34 (m, 5H), 7.19–7.12 (m, 2H), 4.24 (d, *J* = 2.0 Hz, 1H), 4.07 (d, *J* = 1.9 Hz, 1H). <sup>13</sup>C {<sup>1</sup>H} NMR (126 MHz, Chloroform-*d*) δ 191.59, 167.25 (d, C-F, *1J*<sub>C-F</sub> = 258.3 Hz), 135.35, 131.91 (d, C-F, *3J*<sub>C-F</sub> = 2.5 Hz), 131.18 (d, C-F, *3J*<sub>C-F</sub> = 10.1 Hz), 129.13, 128.81, 125.79, 116.13 (d, C-F, *2J*<sub>C-F</sub> = 22.7 Hz), 61.08, 59.30. <sup>19</sup>F NMR (471 MHz, Chloroform-*d*) δ -103.09.

(4-chlorophenyl)(3-phenyloxiran-2-yl)methanone (**b5**)<sup>1</sup>: Following the general procedure, the title product was isolated by column chromatography (EtOAc/petroleum ether, v/v = 1: 79). White solid (41.2 mg, 64% yield). <sup>1</sup>H NMR (500 MHz, Chloroform-*d*) δ 8.00–7.94 (m, 2H), 7.49–7.44 (m, 2H), 7.43–7.34 (m, 5H), 4.23 (d, *J* = 1.8 Hz, 1H), 4.07 (d, *J* = 1.9 Hz, 1H). <sup>13</sup>C {<sup>1</sup>H} NMR (126 MHz, Chloroform-*d*) δ 192.06, 140.62, 135.26, 133.71, 129.82, 129.26, 129.17, 128.83, 125.79, 61.10, 59.40.

(3-phenyloxiran-2-yl)(4-(trifluoromethyl)phenyl)methanone (**b6**)<sup>3</sup>: Following the general procedure, the title product was isolated by column chromatography (EtOAc/petroleum ether, v/v = 1: 79). Light yellow solid (34.3 mg, 47% yield). <sup>1</sup>H NMR (500 MHz, Chloroform-*d*) δ 8.14 (d, *J* = 8.1 Hz, 2H), 7.76 (d, *J* = 8.1 Hz, 2H),

7.45–7.35 (m, 5H), 4.26 (t,  $J = 1.6$  Hz, 1H), 4.10 (t,  $J = 1.5$  Hz, 1H).  $^{13}\text{C}\{^1\text{H}\}$  NMR (126 MHz, Chloroform-*d*)  $\delta$  192.56, 137.97, 135.15 (q, C-F,  $2J_{\text{C-F}} = 32.8$  Hz), 129.28, 128.84 (d, C-F,  $3J_{\text{C-F}} = 8.8$  Hz), 125.93 (q, C-F,  $3J_{\text{C-F}} = 3.8$  Hz), 125.79, 123.43 (q, C-F,  $1J_{\text{C-F}} = 273.4$  Hz), 61.32, 59.52.  $^{19}\text{F}$  NMR (471 MHz, Chloroform-*d*)  $\delta$  -63.29.

benzo[d][1,3]dioxol-5-yl(3-phenyloxiran-2-yl)methanone (**b7**)<sup>4</sup>: Following the general procedure, the title product was isolated by column chromatography (EtOAc/petroleum ether, v/v = 1: 79). Light yellow solid (46.9 mg, 70% yield).  $^1\text{H}$  NMR (500 MHz, Chloroform-*d*)  $\delta$  7.63 (dd,  $J = 8.2, 1.8$  Hz, 1H), 7.49 (d,  $J = 1.7$  Hz, 1H), 7.43–7.34 (m, 5H), 6.86 (d,  $J = 8.3$  Hz, 1H), 6.06 (s, 2H), 4.21 (d,  $J = 1.9$  Hz, 1H), 4.06 (d,  $J = 1.8$  Hz, 1H).  $^{13}\text{C}\{^1\text{H}\}$  NMR (126 MHz, Chloroform-*d*)  $\delta$  190.90, 152.63, 148.49, 135.58, 130.34, 129.02, 128.77, 125.79, 125.05, 108.18, 107.98, 102.06, 60.90, 59.23.

naphthalen-2-yl(3-phenyloxiran-2-yl)methanone (**b8**)<sup>2</sup>: Following the general procedure, the title product was isolated by column chromatography (EtOAc/petroleum ether, v/v = 1: 79). Orange solid (36.3 mg, 53% yield).  $^1\text{H}$  NMR (500 MHz, Chloroform-*d*)  $\delta$  8.50–8.45 (m, 1H), 7.96 (dd,  $J = 8.7, 1.8$  Hz, 1H), 7.88–7.77 (m, 3H), 7.54 (t,  $J = 7.4$  Hz, 1H), 7.47 (t,  $J = 7.6$  Hz, 1H), 7.37–7.29 (m, 5H), 4.35 (d,  $J = 1.9$  Hz, 1H), 4.07 (d,  $J = 1.9$  Hz, 1H).  $^{13}\text{C}\{^1\text{H}\}$  NMR (126 MHz, Chloroform-*d*)  $\delta$  192.90, 135.88, 135.55, 132.82, 132.35, 130.40, 129.67, 129.02, 128.99, 128.82, 128.76, 127.83, 127.03, 125.82, 123.62, 61.03, 59.45.

furan-2-yl(3-phenyloxiran-2-yl)methanone (**b9**)<sup>2</sup>: Following the general procedure, the title product was isolated by column chromatography (EtOAc/petroleum ether, v/v = 1: 79). Brown liquid (18.2 mg, 34% yield). <sup>1</sup>H NMR (500 MHz, Chloroform-*d*) δ 7.67 (d, *J* = 1.6 Hz, 1H), 7.46 (d, *J* = 3.7 Hz, 1H), 7.42–7.32 (m, 5H), 6.60 (dd, *J* = 3.7, 1.7 Hz, 1H), 4.18–4.12 (m, 2H). <sup>13</sup>C{<sup>1</sup>H} NMR (126 MHz, Chloroform-*d*) δ 182.03, 151.19, 147.60, 135.33, 129.03, 128.69, 125.79, 119.49, 112.63, 60.63, 59.56.

(3-(4-methoxyphenyl)oxiran-2-yl)(phenyl)methanone (**b10**)<sup>2</sup>: Following the general procedure, the title product was isolated by column chromatography (EtOAc/petroleum ether, v/v = 1: 79). White solid (33.0 mg, 52% yield). <sup>1</sup>H NMR (500 MHz, Chloroform-*d*) δ 7.92 (d, *J* = 8.5 Hz, 2H), 7.29 (q, *J* = 5.9 Hz, 5H), 6.86 (d, *J* = 8.5 Hz, 2H), 4.19–4.13 (m, 1H), 4.01–3.95 (m, 1H), 3.78 (s, 3H). <sup>13</sup>C{<sup>1</sup>H} NMR (126 MHz, Chloroform-*d*) δ 191.34, 164.25, 135.72, 130.77, 128.97, 128.75, 128.61, 125.81, 114.12, 60.88, 59.18, 55.57.

phenyl(3-(*p*-tolyl)oxiran-2-yl)methanone (**b11**)<sup>1</sup>: Following the general procedure, the title product was isolated by column chromatography (EtOAc/petroleum ether, v/v = 1: 79). White solid (32.3 mg, 54% yield). <sup>1</sup>H NMR (500 MHz, Chloroform-*d*) δ 8.03–7.98 (m, 2H), 7.64–7.58 (m, 1H), 7.48 (t, *J* = 7.9 Hz, 2H), 7.26 (d, *J* = 8.4 Hz, 2H), 7.21 (d, *J* = 8.0 Hz, 2H), 4.29 (d, *J* = 1.9 Hz, 1H), 4.04 (d, *J* = 1.8 Hz, 1H), 2.38 (s, 3H). <sup>13</sup>C{<sup>1</sup>H} NMR (126 MHz, Chloroform-*d*) δ 193.16, 139.02, 135.46, 133.90, 132.42, 129.42, 128.82, 128.29, 125.74, 61.03, 59.42, 21.24.

(3-(4-fluorophenyl)oxiran-2-yl)(phenyl)methanone (**b12**)<sup>2</sup>: Following the general procedure, the title product was isolated by column chromatography (EtOAc/petroleum ether, v/v = 1: 79). Light yellow solid (28.4 mg, 47% yield). <sup>1</sup>H NMR (500 MHz, Chloroform-*d*) δ 8.01 (dd, *J* = 8.1, 1.4 Hz, 2H), 7.66–7.60 (m, 1H), 7.50 (t, *J* = 7.8 Hz, 2H), 7.38–7.32 (m, 2H), 7.09 (t, *J* = 8.6 Hz, 2H), 4.26 (d, *J* = 1.9 Hz, 1H), 4.07 (d, *J* = 1.8 Hz, 1H). <sup>13</sup>C{<sup>1</sup>H} NMR (126 MHz, Chloroform-*d*) δ 192.88, 163.20 (d, C-F, *1J*<sub>C-F</sub> = 248.2 Hz), 135.43, 134.07, 131.29 (d, C-F, *3J*<sub>C-F</sub> = 3.8 Hz), 128.93, 128.36, 127.60 (d, C-F, *3J*<sub>C-F</sub> = 8.8 Hz), 115.87 (d, C-F, *2J*<sub>C-F</sub> = 22.7 Hz), 60.97, 58.79. <sup>19</sup>F NMR (471 MHz, Chloroform-*d*) δ -112.18.

(3-(4-chlorophenyl)oxiran-2-yl)(phenyl)methanone (**b13**)<sup>1</sup>: Following the general procedure, the title product was isolated by column chromatography (EtOAc/petroleum ether, v/v = 1: 79). Light yellow solid (31.0 mg, 48% yield). <sup>1</sup>H NMR (500 MHz, Chloroform-*d*) δ 8.00 (d, *J* = 7.7 Hz, 2H), 7.63 (t, *J* = 7.4 Hz, 1H), 7.50 (t, *J* = 7.6 Hz, 2H), 7.41–7.28 (m, 4H), 4.28–4.22 (m, 1H), 4.09–4.03 (m, 1H). <sup>13</sup>C{<sup>1</sup>H} NMR (126 MHz, Chloroform-*d*) δ 192.68, 135.33, 134.92, 134.07, 134.01, 129.00, 128.89, 128.32, 127.09, 60.90, 58.65.

phenyl(3-(4-(trifluoromethyl)phenyl)oxiran-2-yl)methanone (**b14**)<sup>5</sup>: Following the general procedure, the title product was isolated by column chromatography (EtOAc/petroleum ether, v/v = 1: 79). White solid (49.6 mg, 68% yield). <sup>1</sup>H NMR (500

MHz, Chloroform-*d*)  $\delta$  8.04–7.98 (m, 2H), 7.70–7.61 (m, 3H), 7.50 (dt,  $J = 7.9, 3.6$  Hz, 4H), 4.27 (d,  $J = 1.8$  Hz, 1H), 4.15 (d,  $J = 1.7$  Hz, 1H).  $^{13}\text{C}\{^1\text{H}\}$  NMR (126 MHz, Chloroform-*d*)  $\delta$  192.44, 139.61, 135.32, 134.20, 131.20 (q, C-F,  $2J_{\text{C-F}} = 32.8$  Hz), 128.97, 128.39, 126.12, 125.80 (q, C-F,  $3J_{\text{C-F}} = 3.8$  Hz), 123.89 (q, C-F,  $1J_{\text{C-F}} = 272.2$  Hz), 60.90, 58.44.  $^{19}\text{F}$  NMR (471 MHz, Chloroform-*d*)  $\delta$  -62.68.

(3-(2,6-dimethylphenyl)oxiran-2-yl)(phenyl)methanone (**b15**): Following the general procedure, the title product was isolated by column chromatography (EtOAc/petroleum ether, v/v = 1: 79). White solid (30.9 mg, 49% yield).  $^1\text{H}$  NMR (500 MHz, Chloroform-*d*)  $\delta$  8.15–8.10 (m, 2H), 7.67–7.62 (m, 1H), 7.52 (t,  $J = 7.8$  Hz, 2H), 7.14 (t,  $J = 7.6$  Hz, 1H), 7.01 (d,  $J = 7.5$  Hz, 2H), 4.25–4.20 (m, 2H), 2.39 (s, 6H).  $^{13}\text{C}\{^1\text{H}\}$  NMR (126 MHz, Chloroform-*d*)  $\delta$  194.64, 137.05, 135.69, 134.04, 132.25, 128.92, 128.59, 128.22, 59.02, 57.74, 19.93. HR-MS  $[\text{M}+\text{Na}]^+$  Calcd.: 275.1048, Found: 275.1036.

(3-(2,6-dichlorophenyl)oxiran-2-yl)(phenyl)methanone (**b16**)<sup>6</sup>: Following the general procedure, the title product was isolated by column chromatography (EtOAc/petroleum ether, v/v = 1: 79). White solid (33.6 mg, 46% yield).  $^1\text{H}$  NMR (500 MHz, Chloroform-*d*)  $\delta$  8.17 (dd,  $J = 8.2, 1.5$  Hz, 2H), 7.66 (td,  $J = 7.3, 1.3$  Hz, 1H), 7.54 (t,  $J = 7.8$  Hz, 2H), 7.34 (d,  $J = 8.2$  Hz, 2H), 7.28–7.25 (m, 1H), 4.52 (d,  $J = 1.9$  Hz, 1H), 4.29 (d,  $J = 1.9$  Hz, 1H).  $^{13}\text{C}\{^1\text{H}\}$  NMR (126 MHz, Chloroform-*d*)  $\delta$  193.42, 135.72, 134.09, 131.50, 130.29, 128.87, 128.73, 128.56, 57.27, 57.24.

(3-(naphthalen-2-yl)oxiran-2-yl)(phenyl)methanone (**b17**)<sup>1</sup>: Following the general procedure, the title product was isolated by column chromatography (EtOAc/petroleum ether, v/v = 1: 79). Yellow solid (47.7 mg, 66% yield). <sup>1</sup>H NMR (500 MHz, Chloroform-*d*) δ 8.05–7.99 (m, 2H), 7.86 (ddd, *J* = 14.7, 6.7, 3.5 Hz, 4H), 7.64–7.59 (m, 1H), 7.54–7.46 (m, 4H), 7.44–7.40 (m, 1H), 4.40 (d, *J* = 1.8 Hz, 1H), 4.24 (d, *J* = 1.8 Hz, 1H). <sup>13</sup>C {<sup>1</sup>H} NMR (126 MHz, Chloroform-*d*) δ 193.03, 135.51, 134.02, 133.67, 133.10, 132.90, 128.92, 128.82, 128.38, 127.92, 127.87, 126.72, 126.63, 125.89, 122.45, 61.22, 59.68.

*p*-tolyl(3-(*p*-tolyl)oxiran-2-yl)methanone (**b18**)<sup>3</sup>: Following the general procedure, the title product was isolated by column chromatography (EtOAc/petroleum ether, v/v = 1: 79). White solid (44.1 mg, 70% yield). <sup>1</sup>H NMR (500 MHz, Chloroform-*d*) δ 7.90 (d, *J* = 8.2 Hz, 2H), 7.26 (dd, *J* = 8.2, 6.5 Hz, 4H), 7.20 (d, *J* = 7.9 Hz, 2H), 4.27 (d, *J* = 2.0 Hz, 1H), 4.02 (d, *J* = 2.0 Hz, 1H), 2.41 (s, 3H), 2.37 (s, 3H). <sup>13</sup>C {<sup>1</sup>H} NMR (126 MHz, Chloroform-*d*) δ 192.72, 145.01, 138.99, 133.10, 132.62, 129.56, 129.45, 128.47, 125.80, 60.99, 59.39, 21.80, 21.29.

(4-chlorophenyl)(3-(4-chlorophenyl)oxiran-2-yl)methanone (**b19**)<sup>7</sup>: Following the general procedure, the title product was isolated by column chromatography (EtOAc/petroleum ether, v/v = 1: 79). White solid (42.3 mg, 58% yield). <sup>1</sup>H NMR (500 MHz, Chloroform-*d*) δ 7.99–7.93 (m, 2H), 7.50–7.45 (m, 2H), 7.41–7.36 (m, 2H), 7.30 (d, *J* = 8.5 Hz, 2H), 4.18 (d, *J* = 1.8 Hz, 1H), 4.06 (d, *J* = 1.8 Hz, 1H). <sup>13</sup>C {<sup>1</sup>H} NMR

(126 MHz, Chloroform-*d*)  $\delta$  191.71, 140.74, 135.09, 133.82, 133.62, 129.81, 129.30, 129.08, 127.11, 61.00, 58.66.

(3-methyloxiran-2-yl)(phenyl)methanone (**b20**)<sup>8</sup>: Following the general procedure, the title product was isolated by column chromatography (EtOAc/petroleum ether, v/v = 1: 79). Light yellow liquid (14.6 mg, 36% yield). <sup>1</sup>H NMR (500 MHz, Chloroform-*d*)  $\delta$  8.04–8.00 (m, 2H), 7.65–7.60 (m, 1H), 7.51 (t, *J* = 7.8 Hz, 2H), 3.98 (d, *J* = 1.9 Hz, 1H), 3.23 (qd, *J* = 5.1, 2.0 Hz, 1H), 1.53 (d, *J* = 5.1 Hz, 3H). <sup>13</sup>C{<sup>1</sup>H} NMR (126 MHz, Chloroform-*d*)  $\delta$  194.62, 135.61, 133.80, 128.80, 128.30, 58.36, 55.92, 17.64.

cyclohexyl(3-phenyloxiran-2-yl)methanone (**b21**)<sup>2</sup>: Following the general procedure, the title product was isolated by column chromatography (EtOAc/petroleum ether, v/v = 1: 79). Colorless liquid (19.6 mg, 34% yield). <sup>1</sup>H NMR (500 MHz, Chloroform-*d*)  $\delta$  7.39–7.32 (m, 3H), 7.28 (dd, *J* = 7.7, 2.0 Hz, 2H), 3.91 (d, *J* = 1.8 Hz, 1H), 3.59 (d, *J* = 1.7 Hz, 1H), 2.57 (ddt, *J* = 11.4, 8.4, 3.3 Hz, 1H), 1.99–1.89 (m, 1H), 1.81 (tq, *J* = 10.1, 4.0, 3.6 Hz, 3H), 1.68 (ddd, *J* = 15.6, 7.7, 5.0 Hz, 1H), 1.54–1.42 (m, 1H), 1.35–1.17 (m, 4H). <sup>13</sup>C{<sup>1</sup>H} NMR (126 MHz, Chloroform-*d*)  $\delta$  207.87, 135.42, 128.93, 128.69, 125.68, 62.03, 58.39, 46.82, 28.35, 27.51, 25.71, 25.66, 25.28.

2,2-dimethyl-1-(3-phenyloxiran-2-yl)propan-1-one (**b22**)<sup>1</sup>: Following the general procedure, the title product was isolated by column chromatography (EtOAc/petroleum ether, v/v = 1: 79). Light yellow solid (29.6 mg, 58% yield). <sup>1</sup>H NMR (500 MHz,



Chloroform-*d*)  $\delta$  7.41–7.35 (m, 3H), 7.31 (dt,  $J = 7.5, 1.5$  Hz, 2H), 3.86 (q,  $J = 1.9$  Hz, 2H), 1.24 (s, 9H).  $^{13}\text{C}\{^1\text{H}\}$  NMR (126 MHz, Chloroform-*d*)  $\delta$  208.12, 135.62, 128.90, 128.72, 125.62, 59.35, 59.14, 43.59, 25.72.

(4-(methylthio)phenyl)(3-phenyloxiran-2-yl)methanone (**b23**): Following the general procedure, the title product was isolated by column chromatography (EtOAc/petroleum ether, v/v = 1: 79). White solid (22.9 mg, 34% yield).  $^1\text{H}$  NMR (500 MHz, Chloroform-*d*)  $\delta$  7.96–7.90 (m, 2H), 7.39 (dtdd,  $J = 9.6, 7.3, 5.1, 2.2$  Hz, 5H), 7.30–7.25 (m, 2H), 4.24 (d,  $J = 1.8$  Hz, 1H), 4.07 (d,  $J = 1.9$  Hz, 1H), 2.52 (s, 3H).  $^{13}\text{C}\{^1\text{H}\}$  NMR (126 MHz, Chloroform-*d*)  $\delta$  191.93, 147.47, 135.58, 131.69, 129.03, 128.77, 128.74, 125.80, 125.08, 60.97, 59.29, 14.68. HR-MS  $[\text{M}+\text{Na}]^+$  Calcd.: 293.0612, Found: 293.0610.

(4-(dimethylamino)phenyl)(3-phenyloxiran-2-yl)methanone (**b24**): Following the general procedure, the title product was isolated by column chromatography (EtOAc/petroleum ether, v/v = 1: 79). Brown solid (21.4 mg, 32% yield).  $^1\text{H}$  NMR (500 MHz, Chloroform-*d*)  $\delta$  7.97 (d,  $J = 8.3$  Hz, 2H), 7.78 (d,  $J = 15.6$  Hz, 1H), 7.63 (dd,  $J = 7.5, 1.8$  Hz, 2H), 7.56 (d,  $J = 15.6$  Hz, 1H), 7.40 (q,  $J = 6.6$  Hz, 3H), 6.62 (d,  $J = 8.4$  Hz, 2H), 3.48 (t,  $J = 1.5$  Hz, 3H), 2.92 (s, 3H).  $^{13}\text{C}\{^1\text{H}\}$  NMR (126 MHz, Chloroform-*d*)  $\delta$  187.97, 153.07, 142.77, 135.46, 131.09, 129.97, 128.85, 128.23, 127.30, 122.20, 111.40, 50.82, 30.18. HR-MS  $[\text{M}+\text{Na}]^+$  Calcd.: 290.1157, Found: 290.1151.

(2-hydroxyphenyl)(3-phenyloxiran-2-yl)methanone (**b25**)<sup>9</sup>: Following the general

procedure, the title product was isolated by column chromatography (EtOAc/petroleum ether, v/v = 1: 79). Light orange solid (41.4 mg, 69% yield).  $^1\text{H}$  NMR (500 MHz, Chloroform-*d*)  $\delta$  7.93 (dd,  $J = 8.1, 1.7$  Hz, 1H), 7.50 (dd,  $J = 13.3, 6.8$  Hz, 3H), 7.43 (t,  $J = 7.5$  Hz, 2H), 7.38 (t,  $J = 7.3$  Hz, 1H), 7.05 (dt,  $J = 7.5, 3.1$  Hz, 2H), 5.48 (dd,  $J = 13.4, 2.9$  Hz, 1H), 3.08 (dd,  $J = 16.8, 13.3$  Hz, 1H), 2.89 (dd,  $J = 16.8, 2.9$  Hz, 1H).  $^{13}\text{C}\{^1\text{H}\}$  NMR (126 MHz, Chloroform-*d*)  $\delta$  191.96, 161.57, 138.77, 136.22, 128.87, 128.80, 127.08, 126.18, 121.64, 120.96, 118.16, 79.62, 44.70.

3'-phenyl-3,4-dihydro-1H-spiro[naphthalene-2,2'-oxiran]-1-one (**b26**)<sup>2</sup>: Following the general procedure, the title product was isolated by column chromatography (EtOAc/petroleum ether, v/v = 1: 79). Yellow solid (20.6 mg, 33% yield).  $^1\text{H}$  NMR (500 MHz, Chloroform-*d*)  $\delta$  8.12 (dd,  $J = 7.9, 1.4$  Hz, 1H), 7.52 (td,  $J = 7.5, 1.4$  Hz, 1H), 7.42–7.33 (m, 6H), 7.22 (d,  $J = 7.6$  Hz, 1H), 4.37 (s, 1H), 2.86–2.80 (m, 2H), 2.50–2.40 (m, 1H), 1.86 (dt,  $J = 13.5, 4.1$  Hz, 1H).  $^{13}\text{C}\{^1\text{H}\}$  NMR (126 MHz, Chloroform-*d*)  $\delta$  193.59, 143.33, 134.22, 134.11, 132.67, 128.72, 128.34, 128.31, 127.64, 126.98, 126.62, 64.31, 64.09, 27.33, 25.32.

## 7. $^1\text{H}$ , $^{13}\text{C}$ , and $^{19}\text{F}$ NMR Spectra of Isolated Products

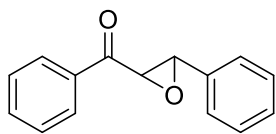

phenyl(3-phenyloxiran-2-yl)methanone (**b1**)

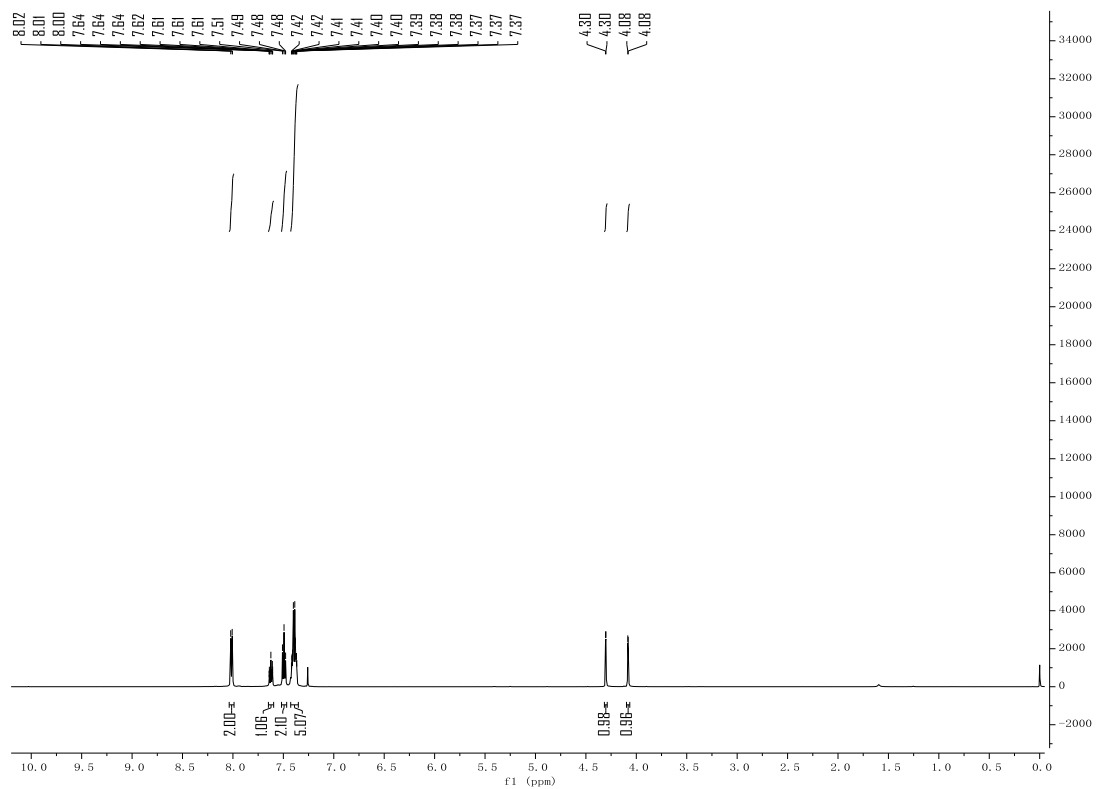

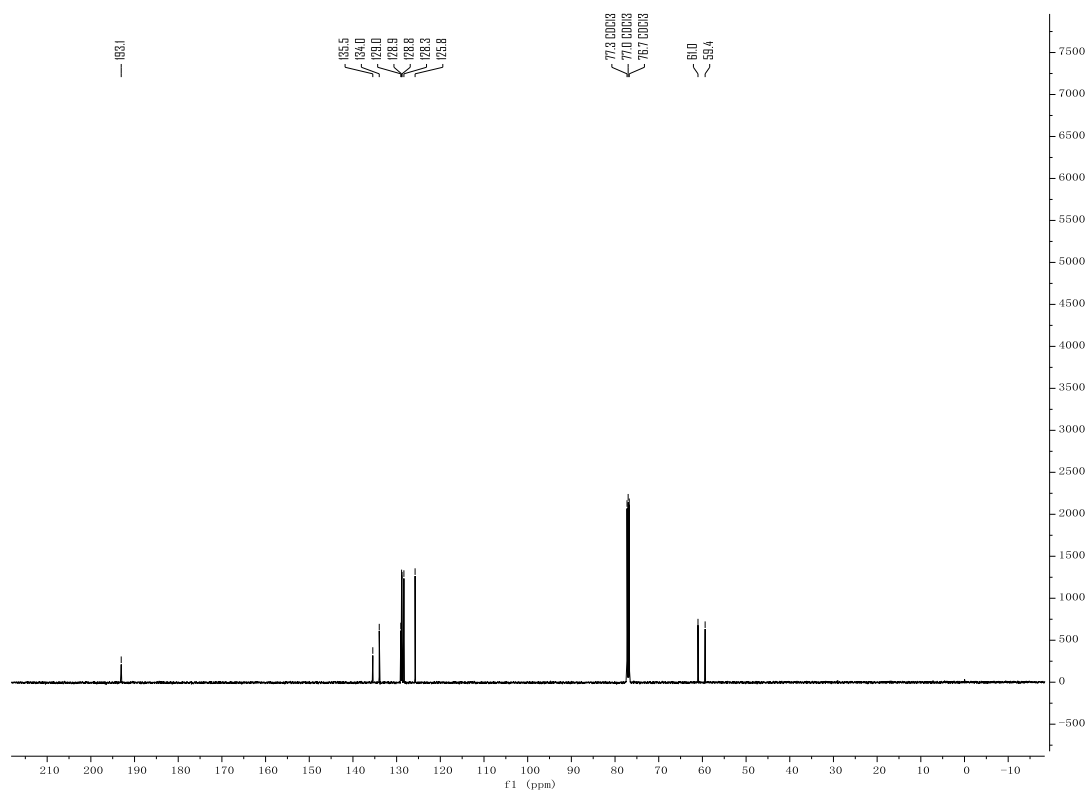

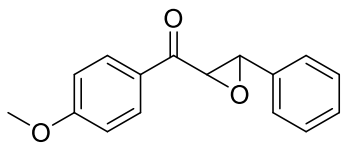

(4-methoxyphenyl)(3-phenyloxiran-2-yl)methanone (**b2**)

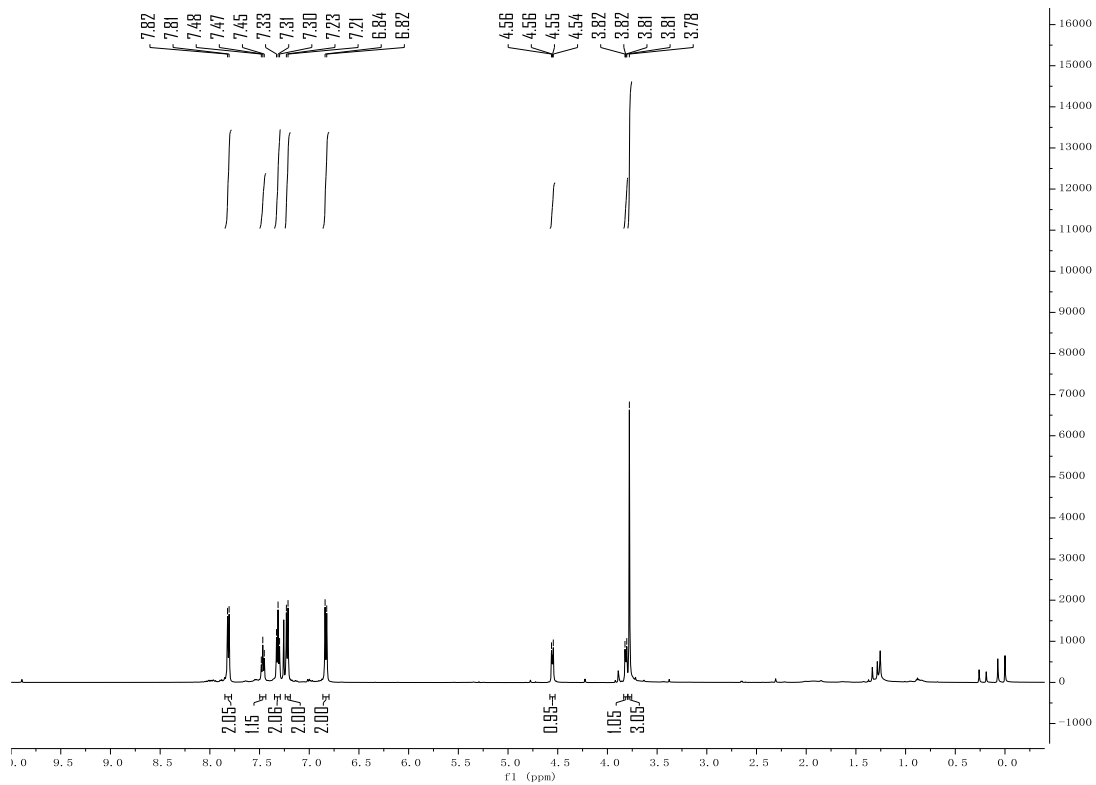

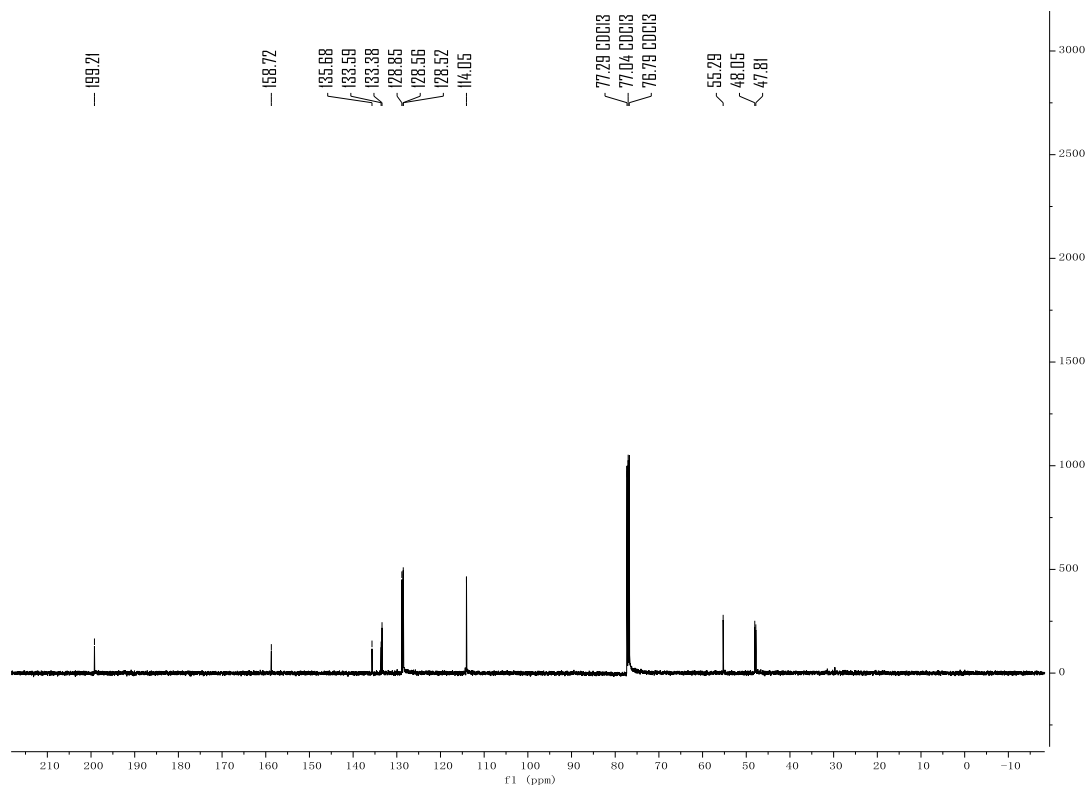

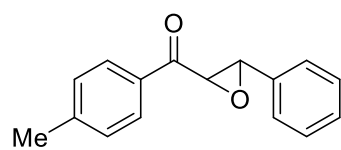

(3-phenyloxiran-2-yl)(p-tolyl)methanone (**b3**)

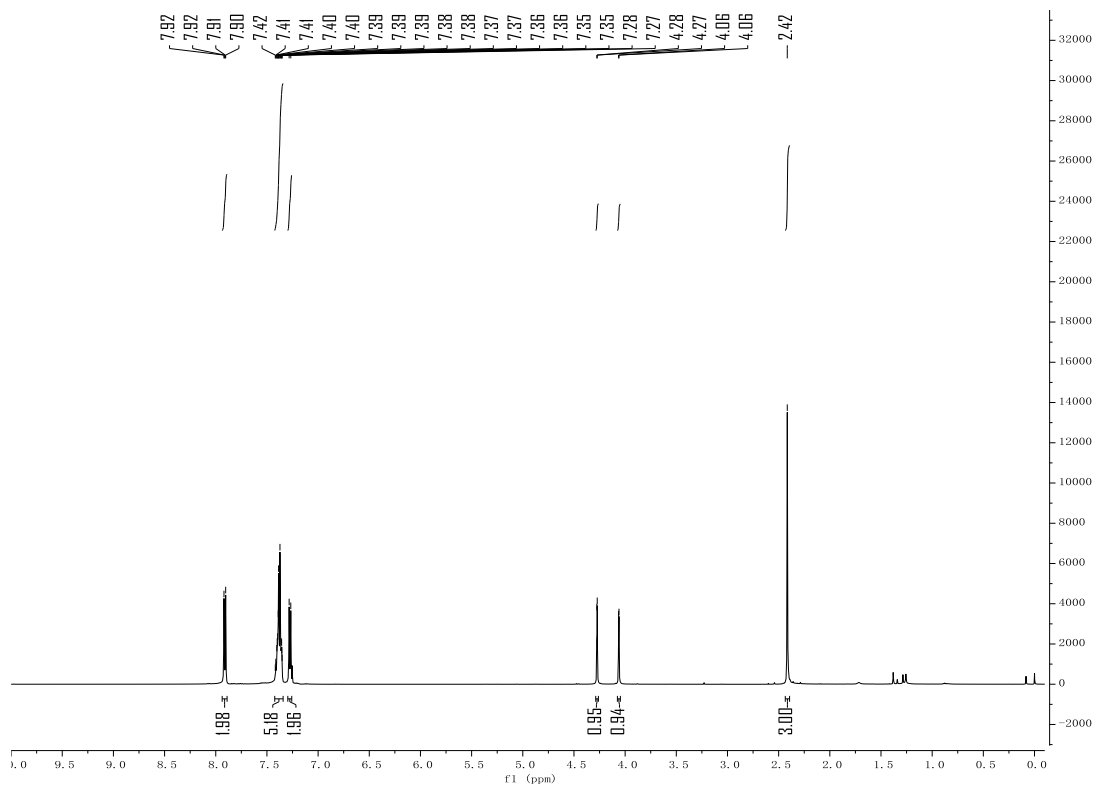

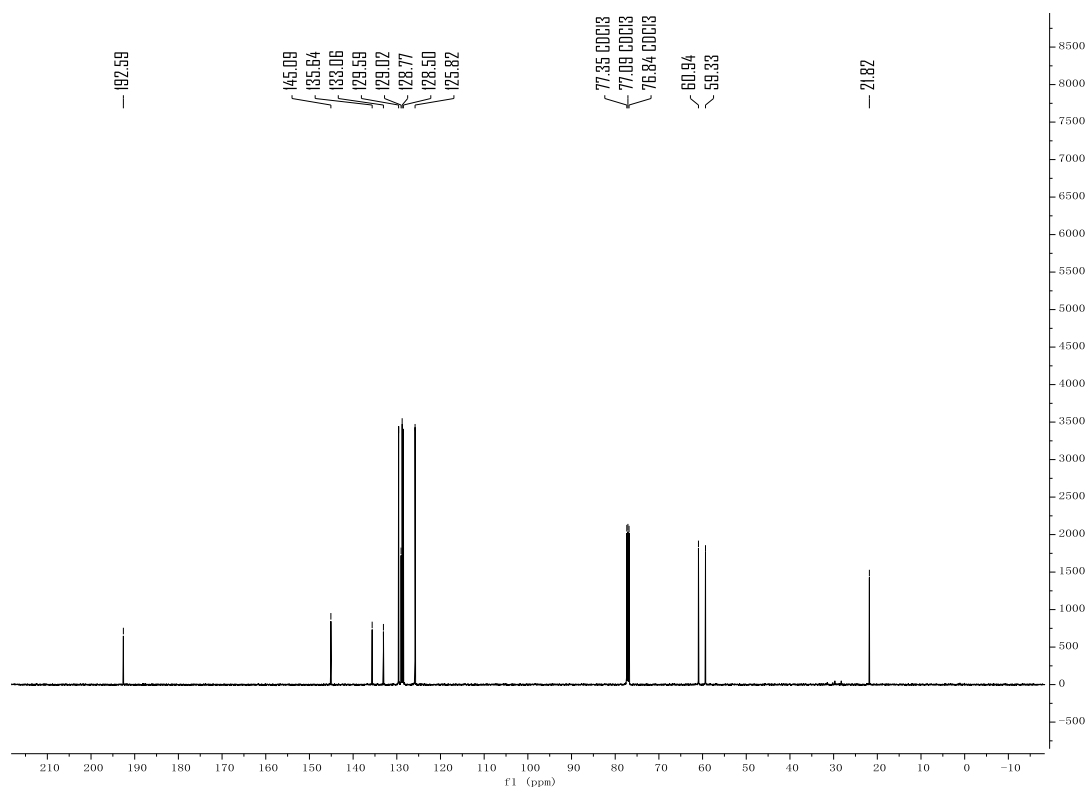



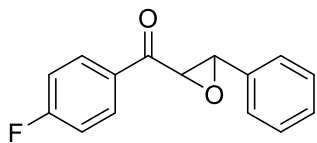

(4-fluorophenyl)(3-phenyloxiran-2-yl)methanone (**b4**)

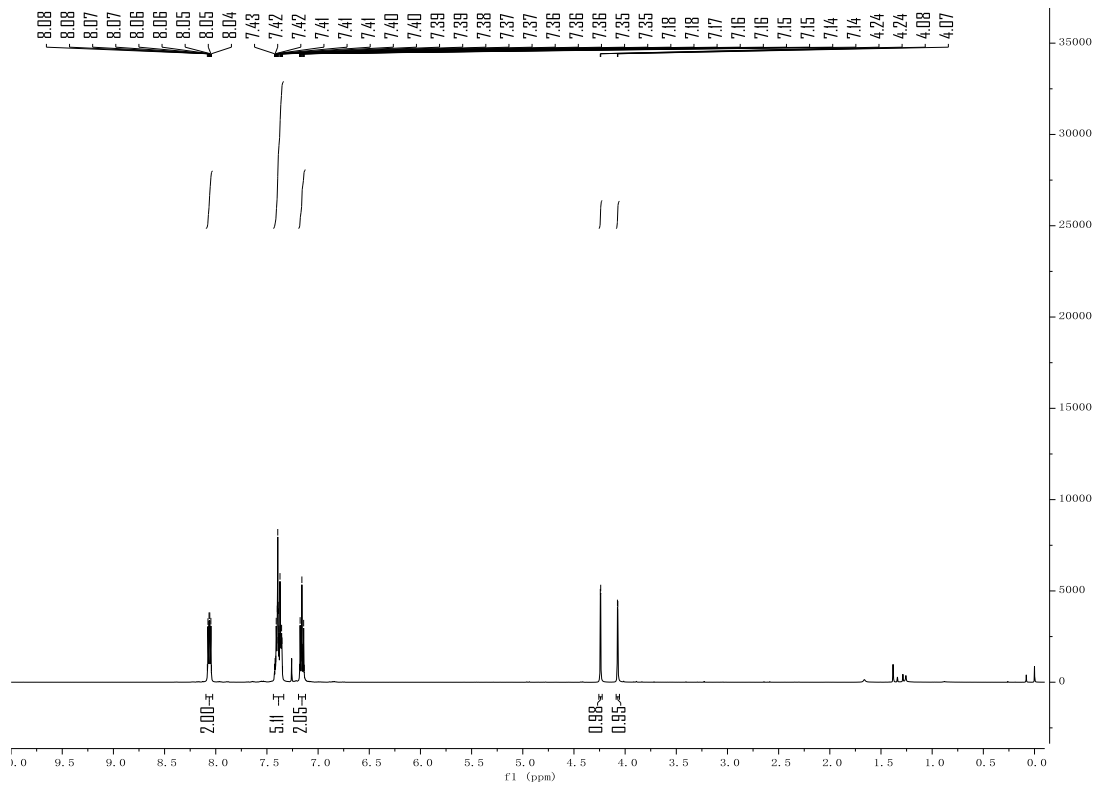

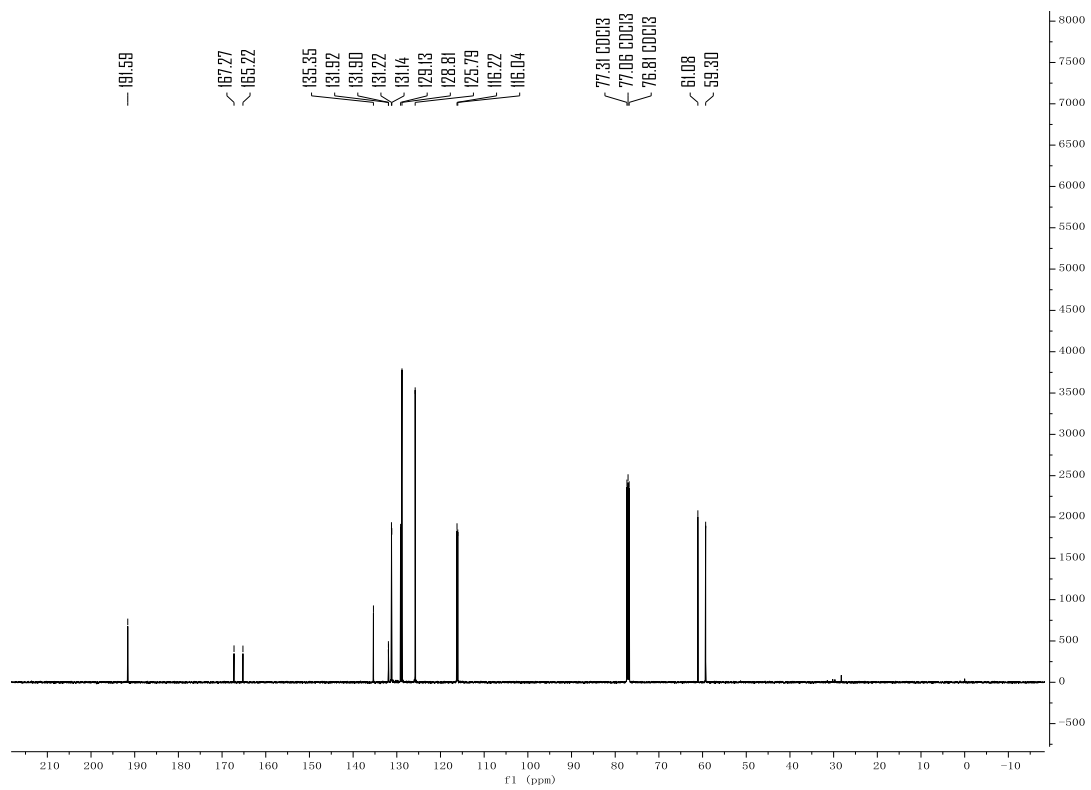

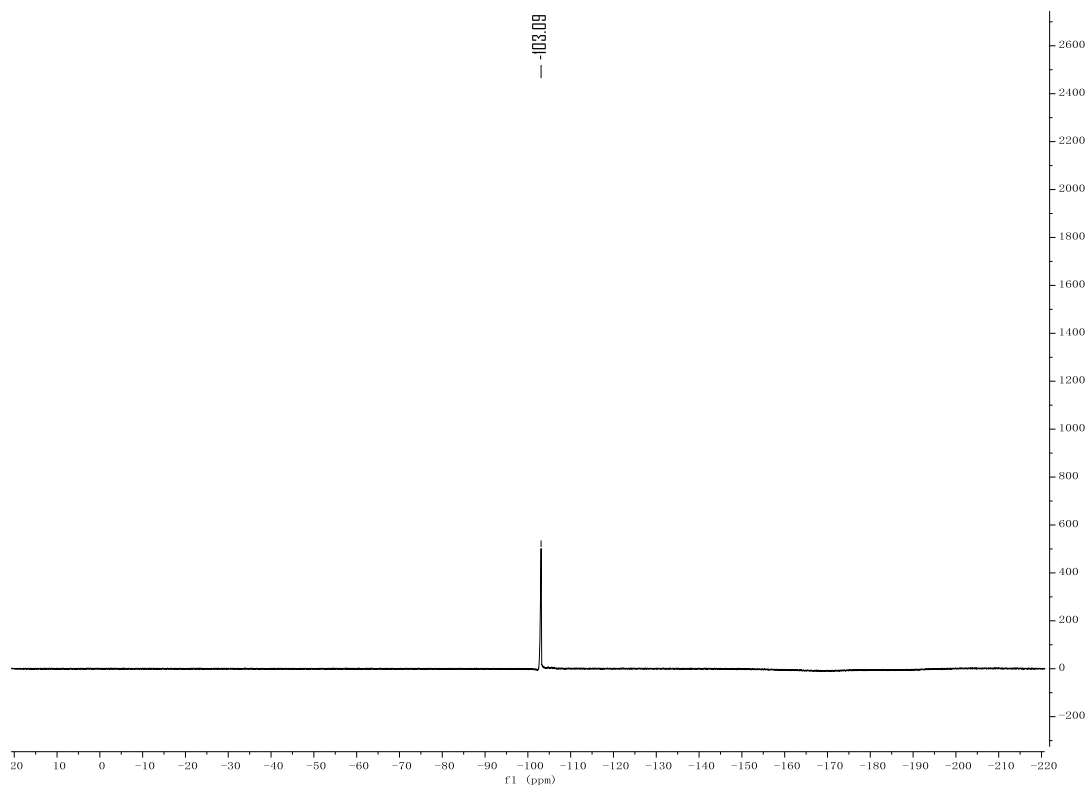

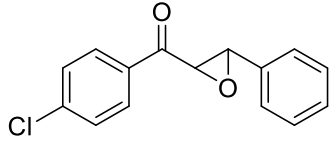

(4-chlorophenyl)(3-phenyloxiran-2-yl)methanone (**b5**)

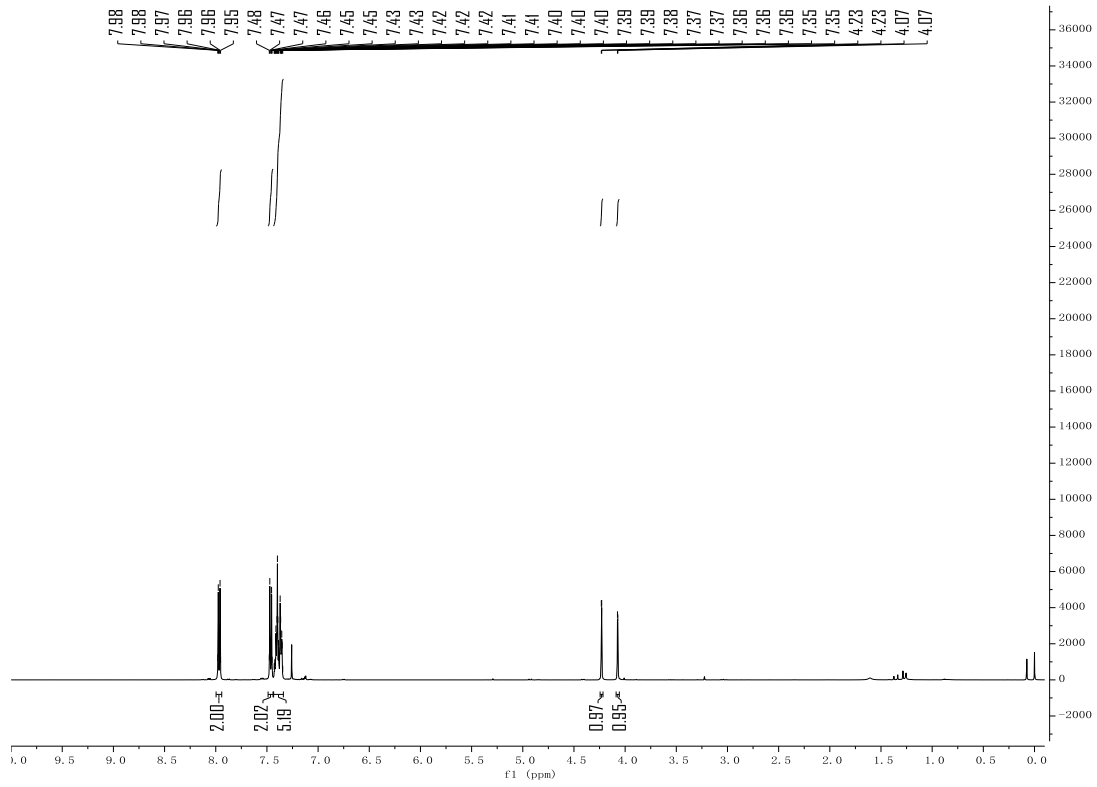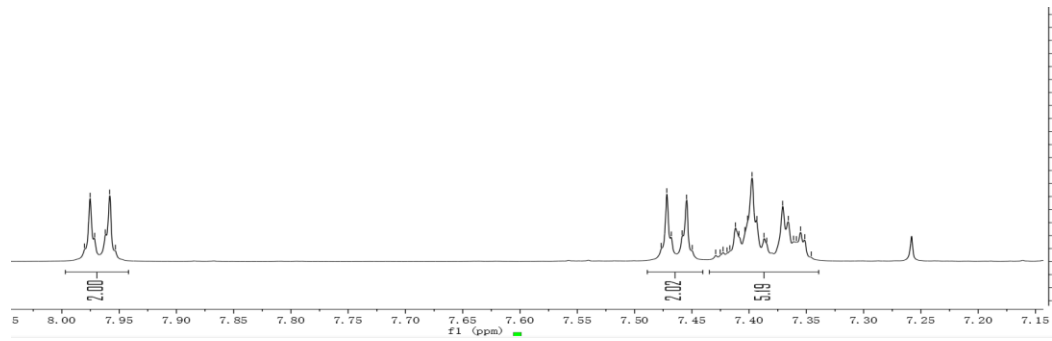

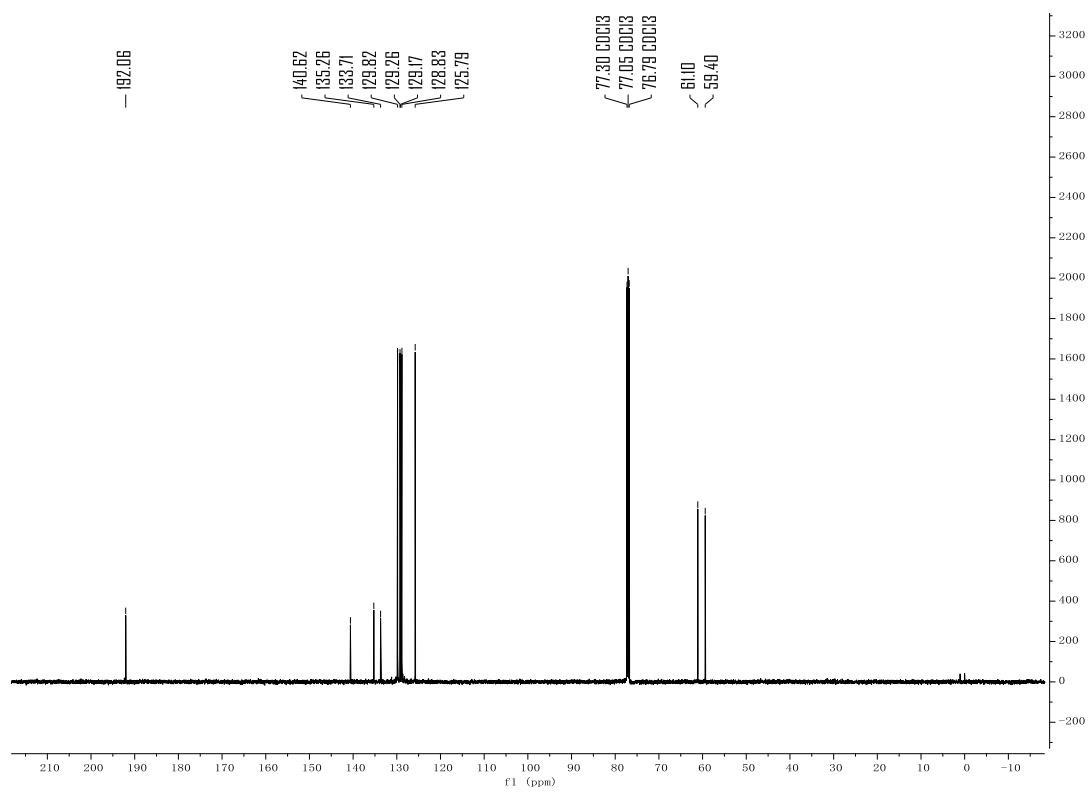

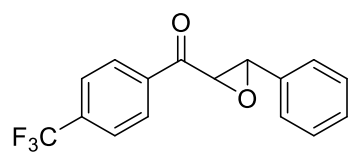

(3-phenyloxiran-2-yl)(4-(trifluoromethyl)phenyl)methanone (**b6**)

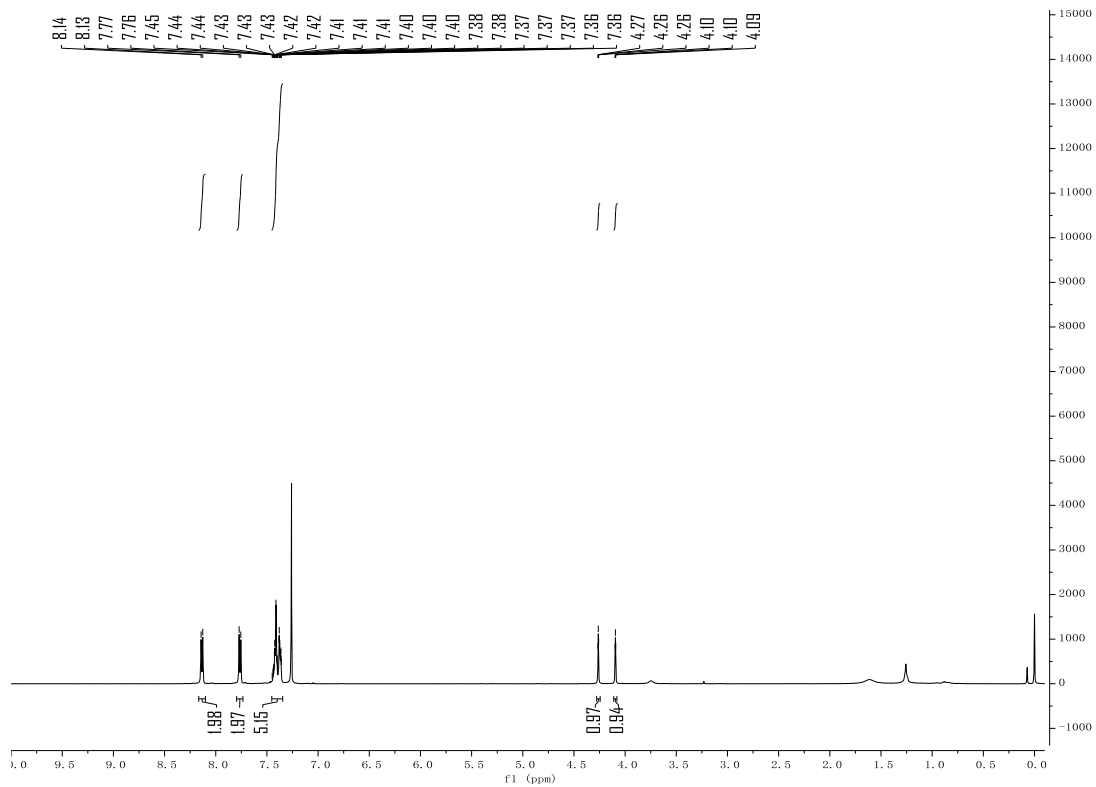

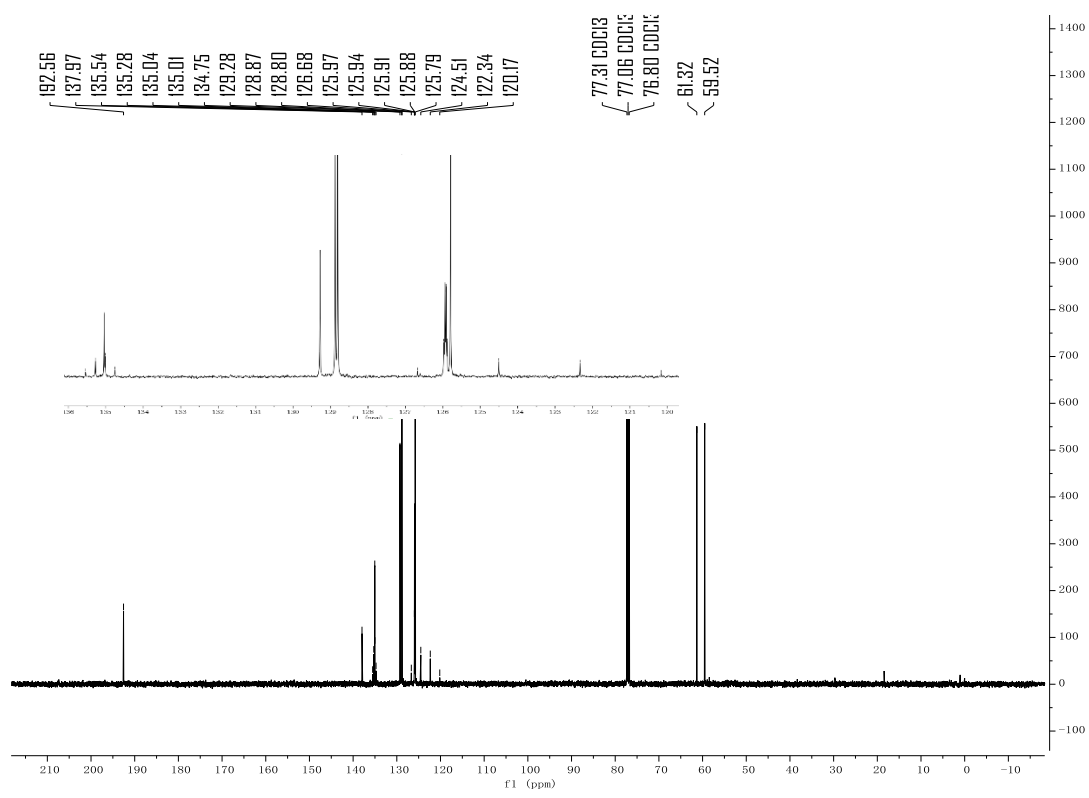

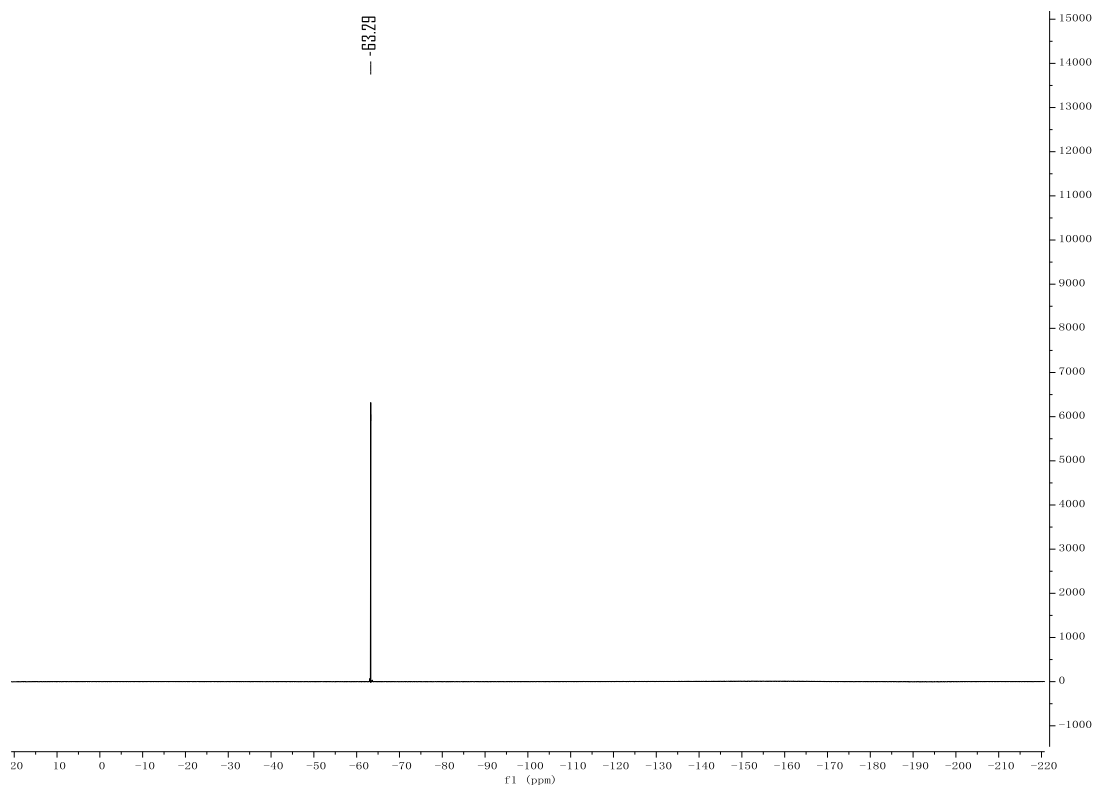



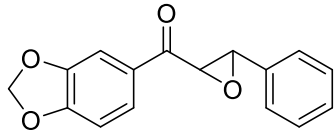

benzo[d][1,3]dioxol-5-yl(3-phenyloxiran-2-yl)methanone (b7)

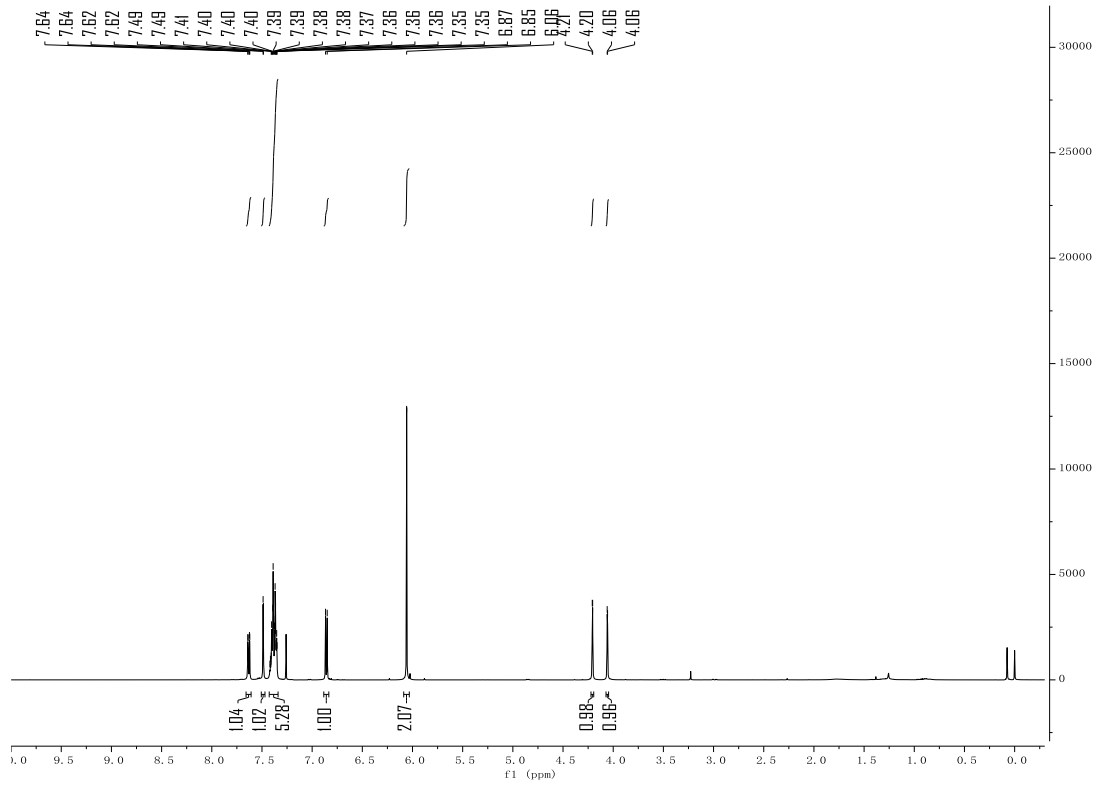

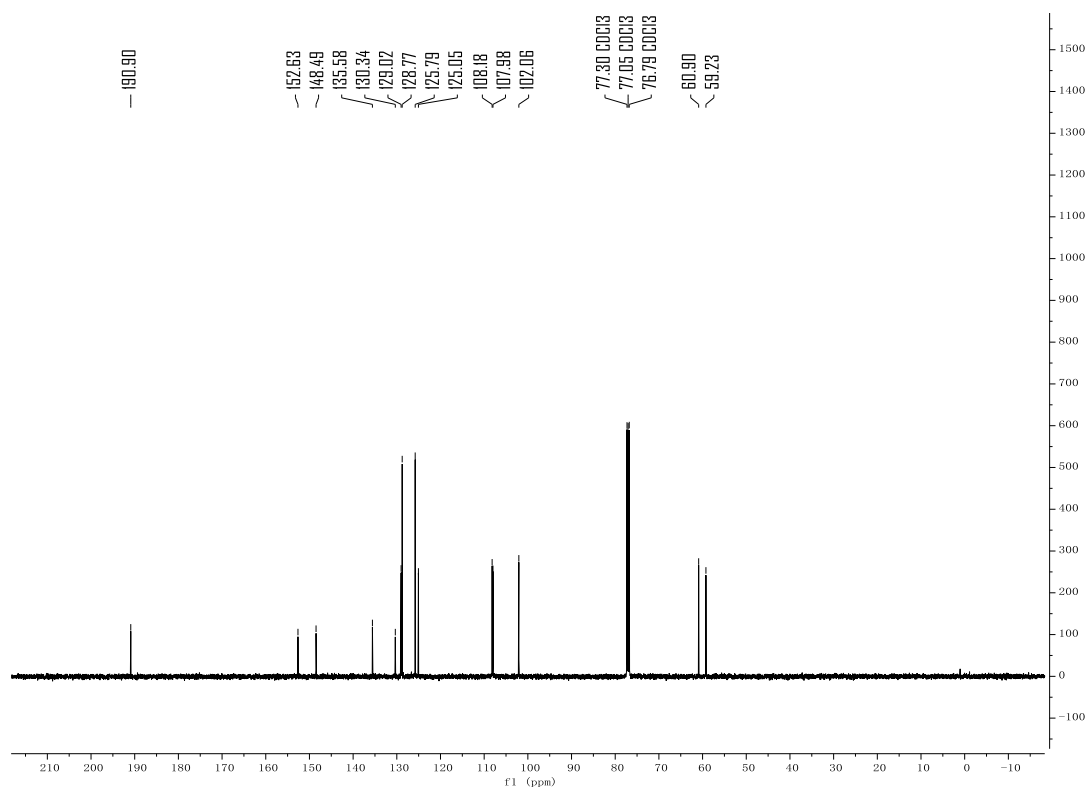

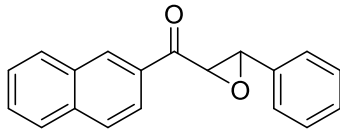

naphthalen-2-yl(3-phenyloxiran-2-yl)methanone (**b8**)

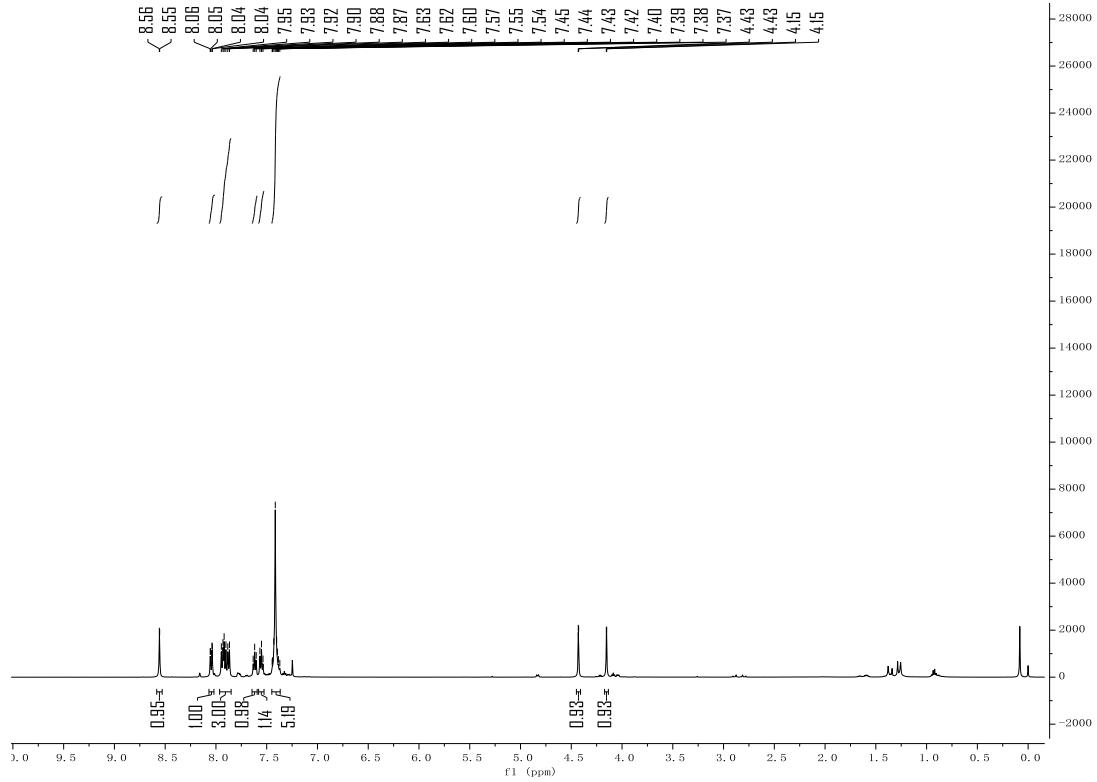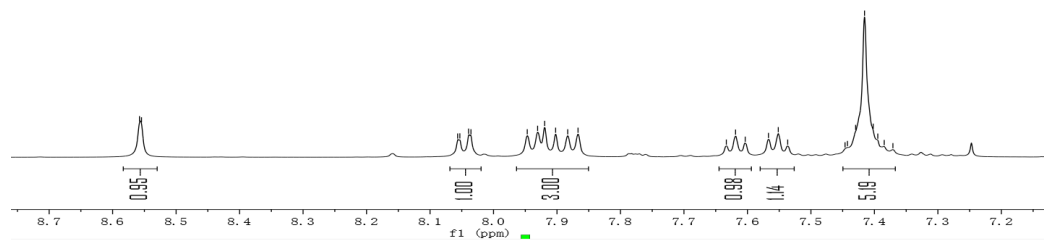

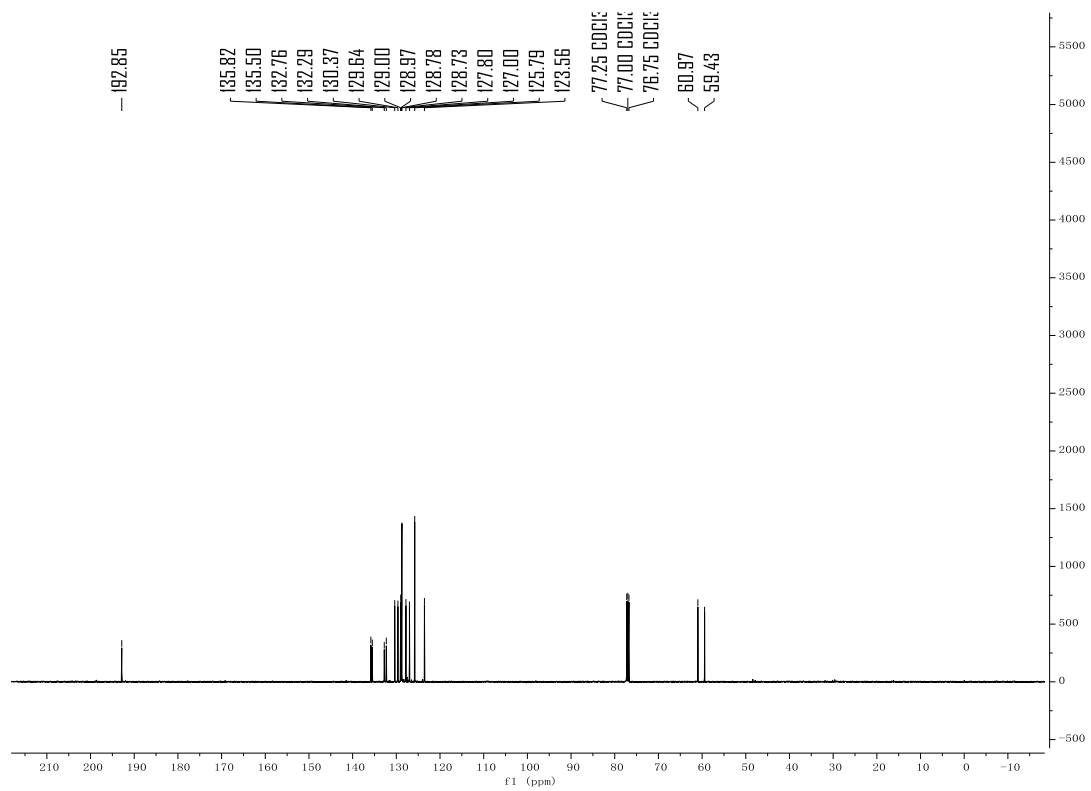

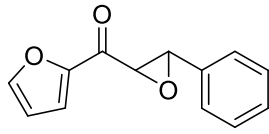

furan-2-yl(3-phenyloxiran-2-yl)methanone (**b9**)

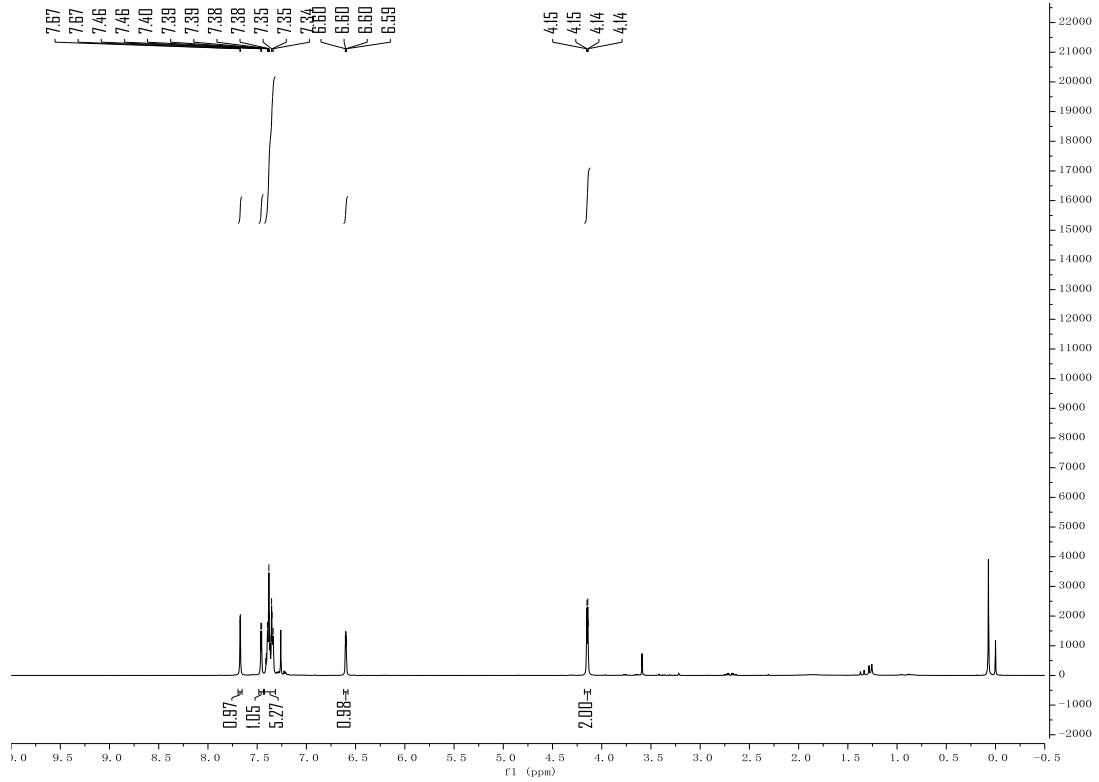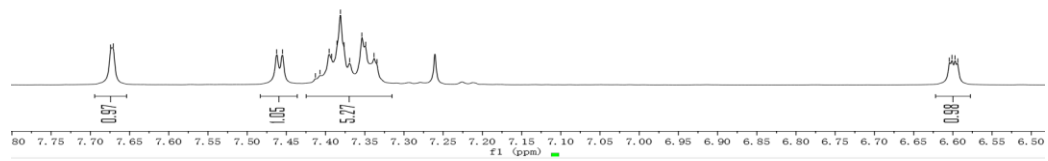

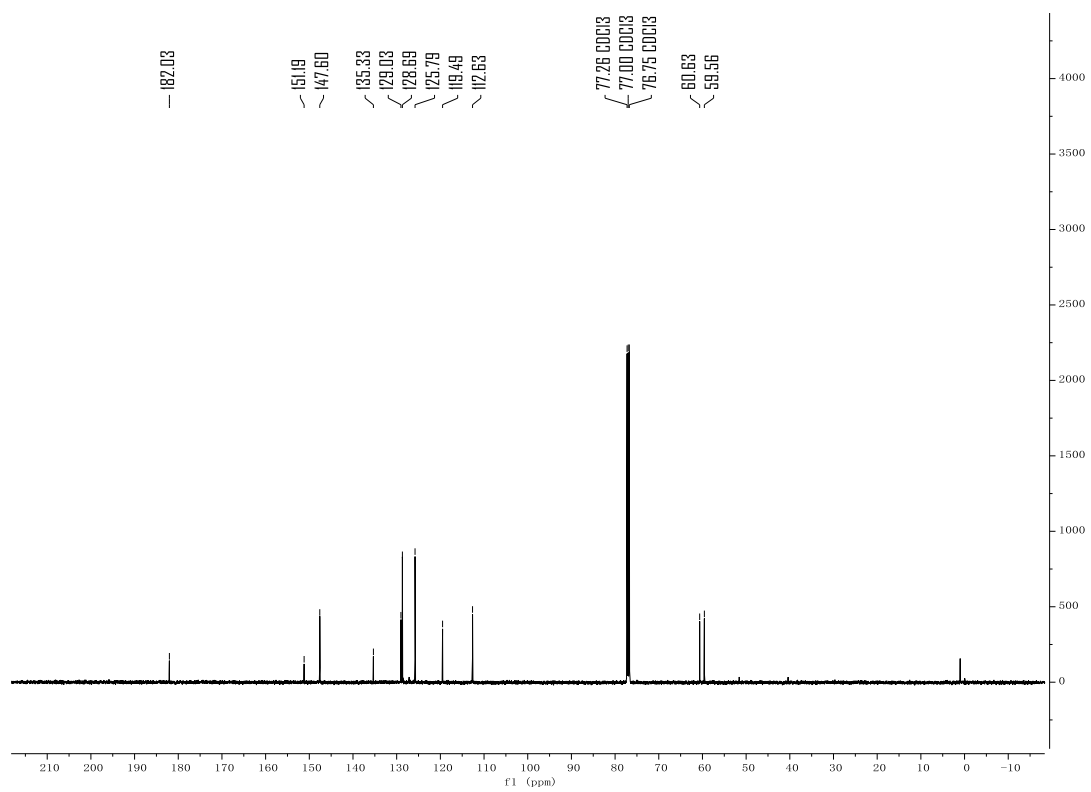

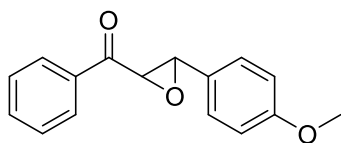

(3-(4-methoxyphenyl)oxiran-2-yl)(phenyl)methanone (**b10**)

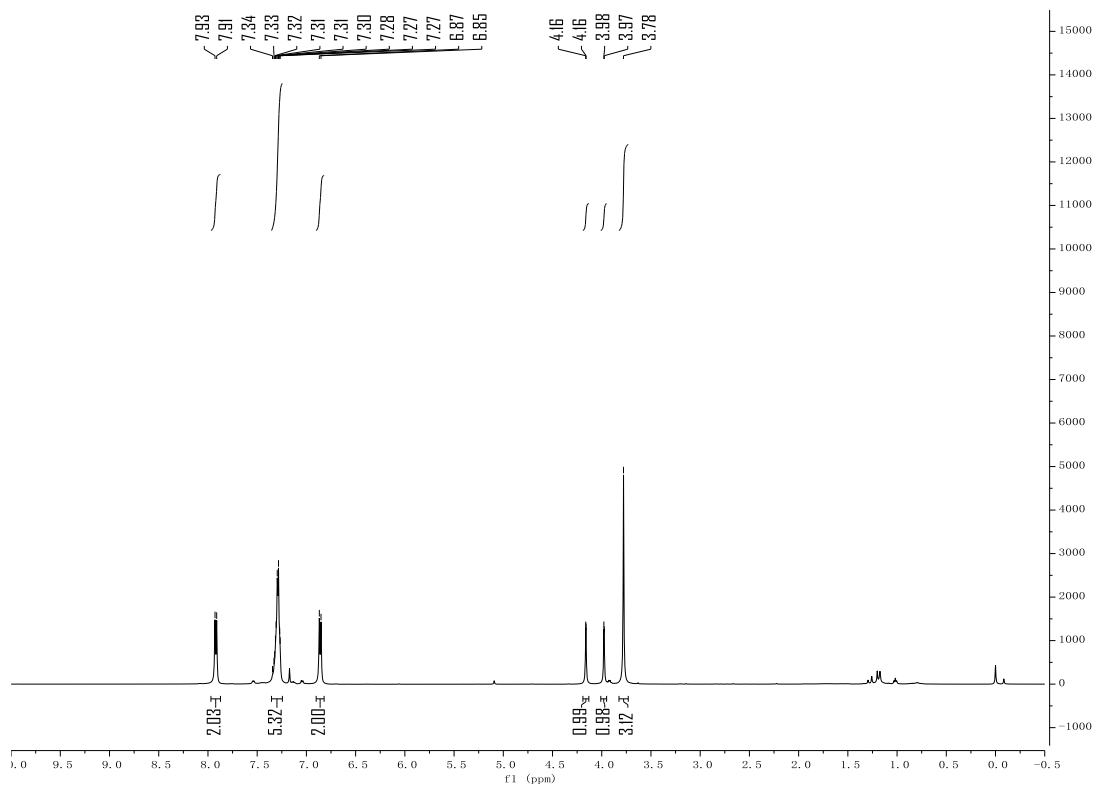

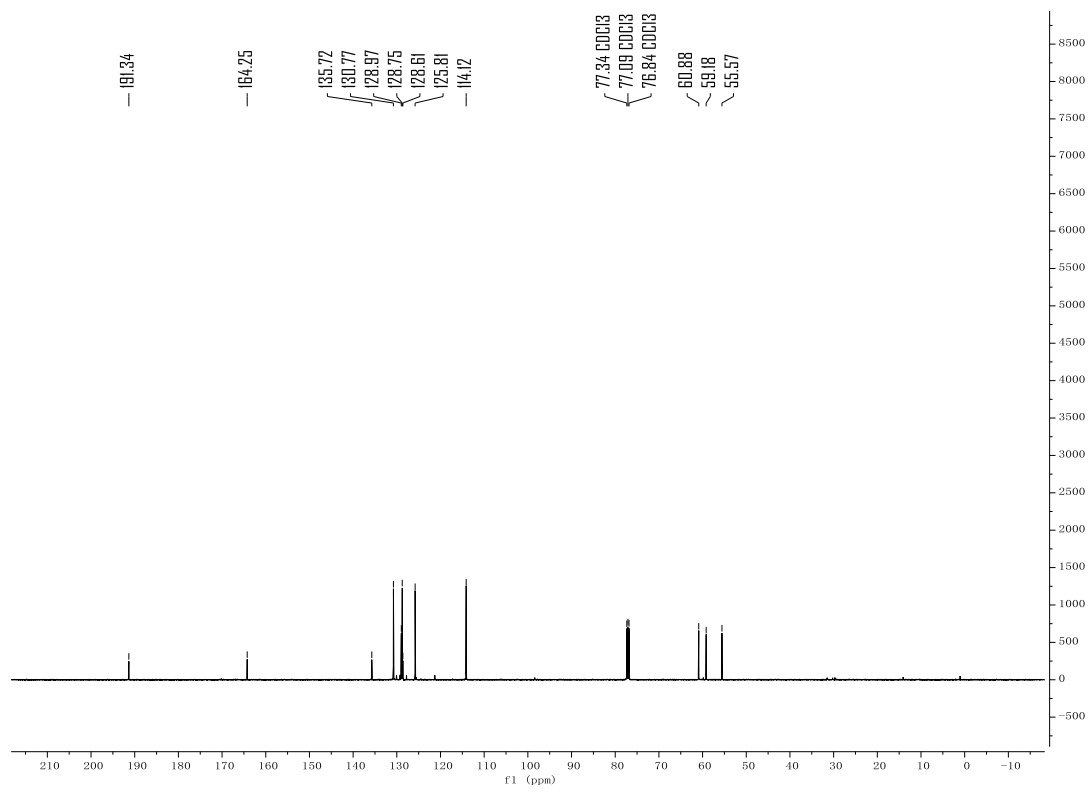



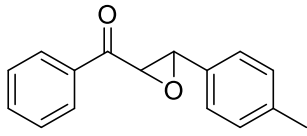

phenyl(3-(p-tolyl)oxiran-2-yl)methanone (**b11**)

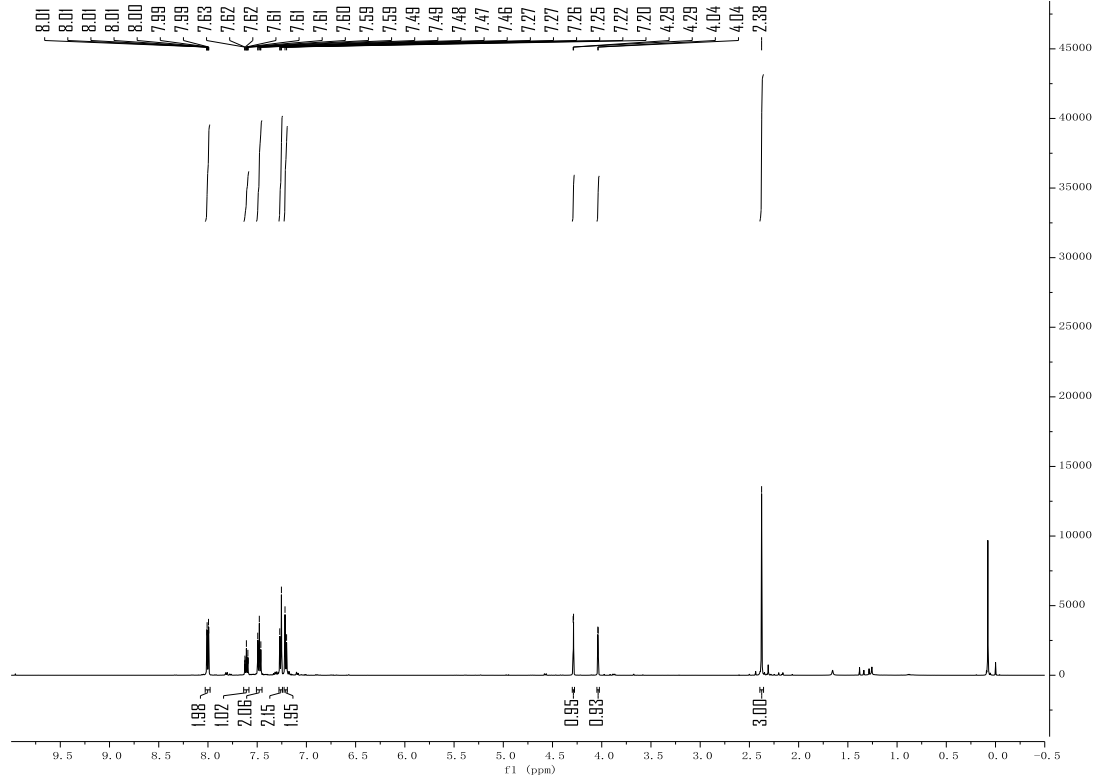

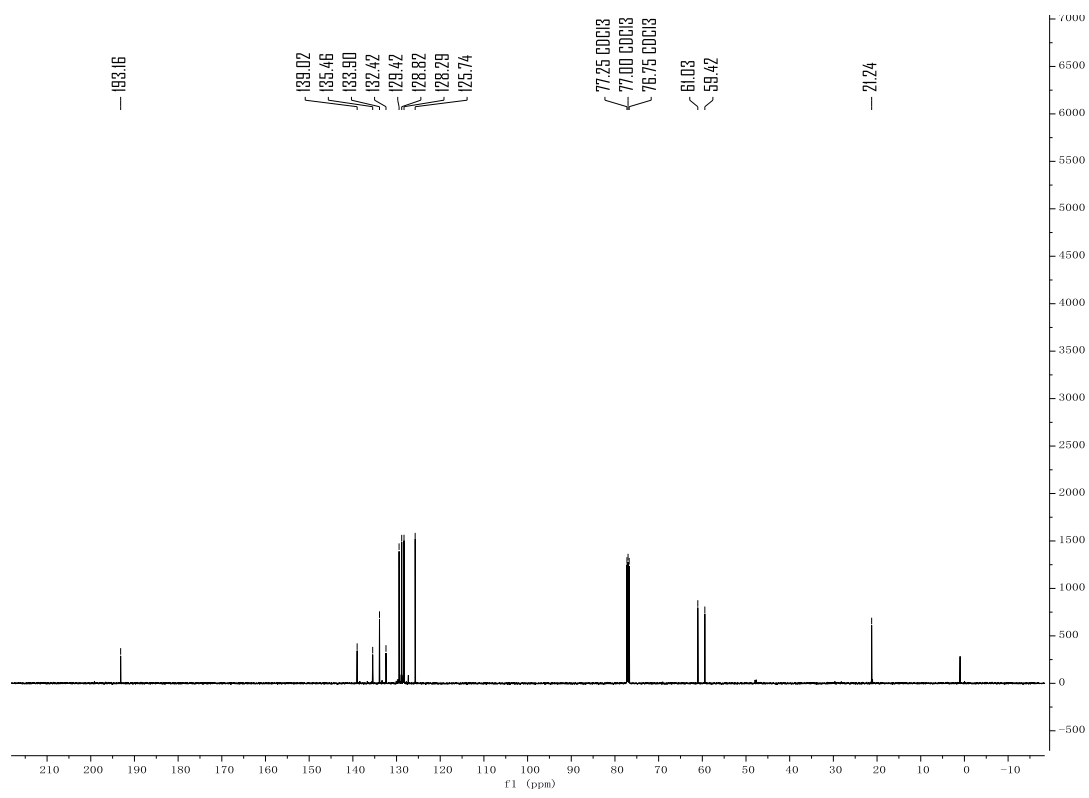

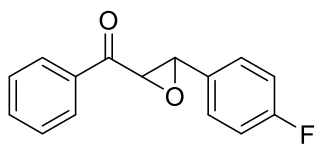

(3-(4-fluorophenyl)oxiran-2-yl)(phenyl)methanone (**b12**)

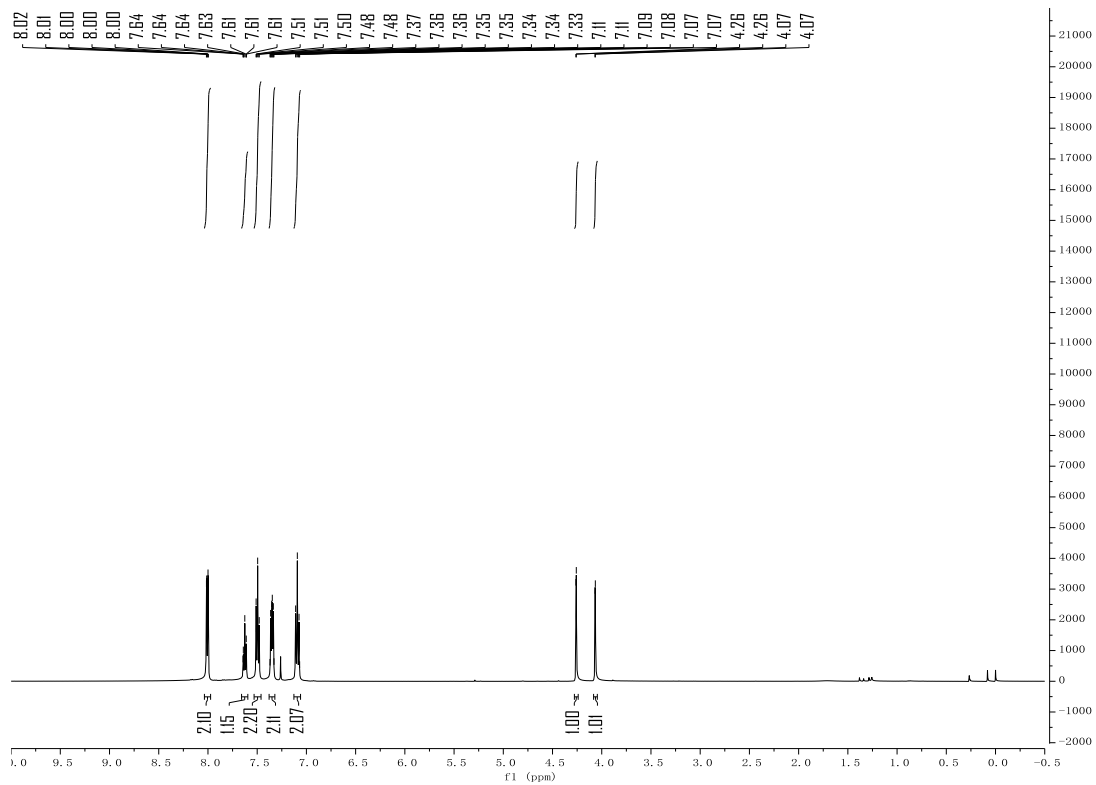

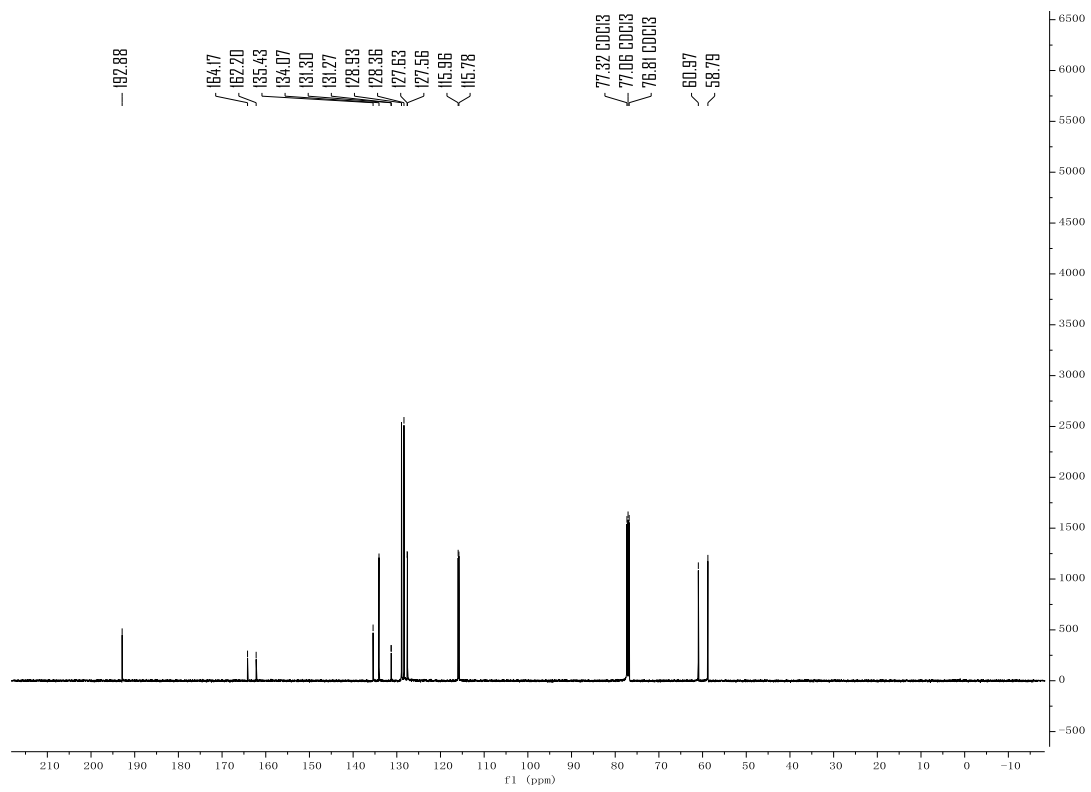

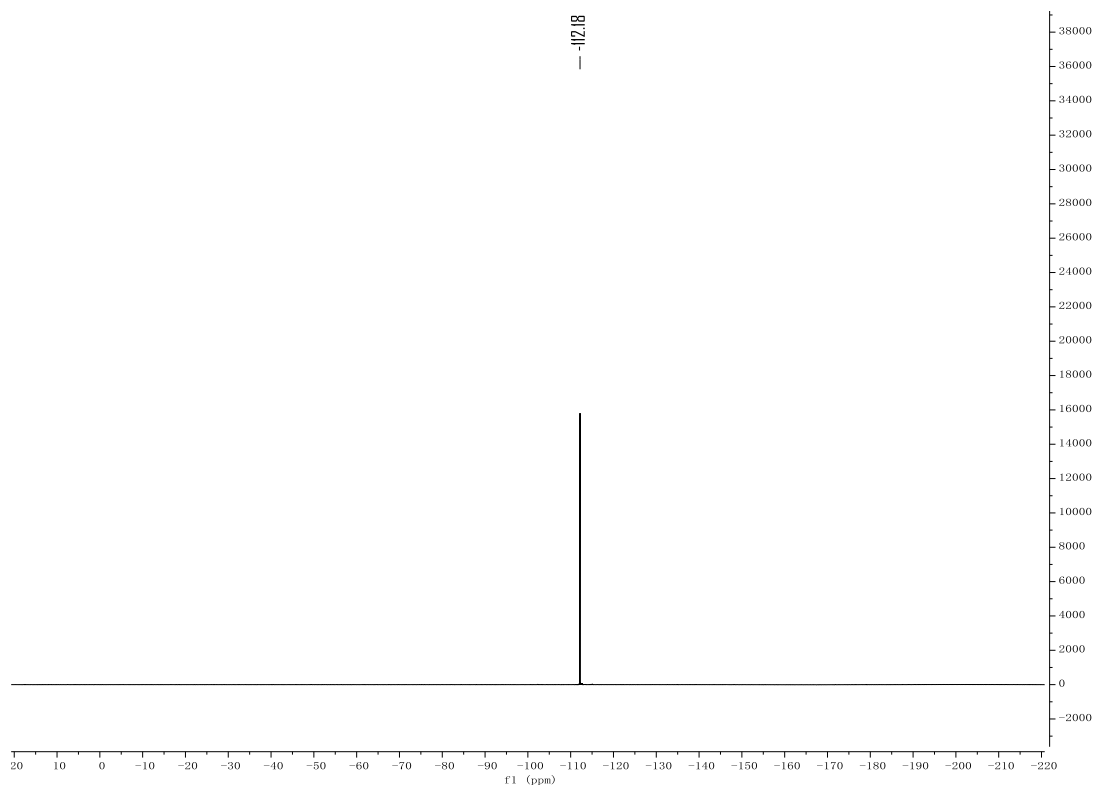

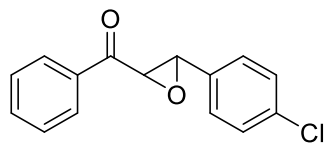

(3-(4-chlorophenyl)oxiran-2-yl)(phenyl)methanone (**b13**)

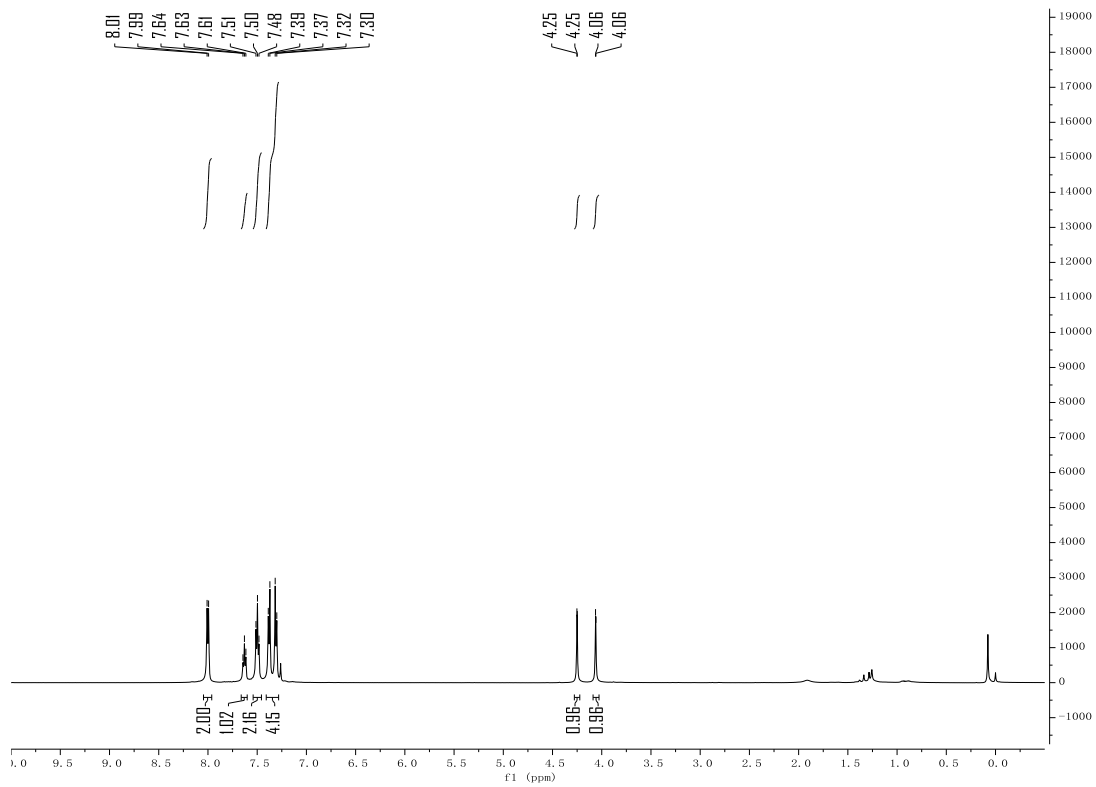

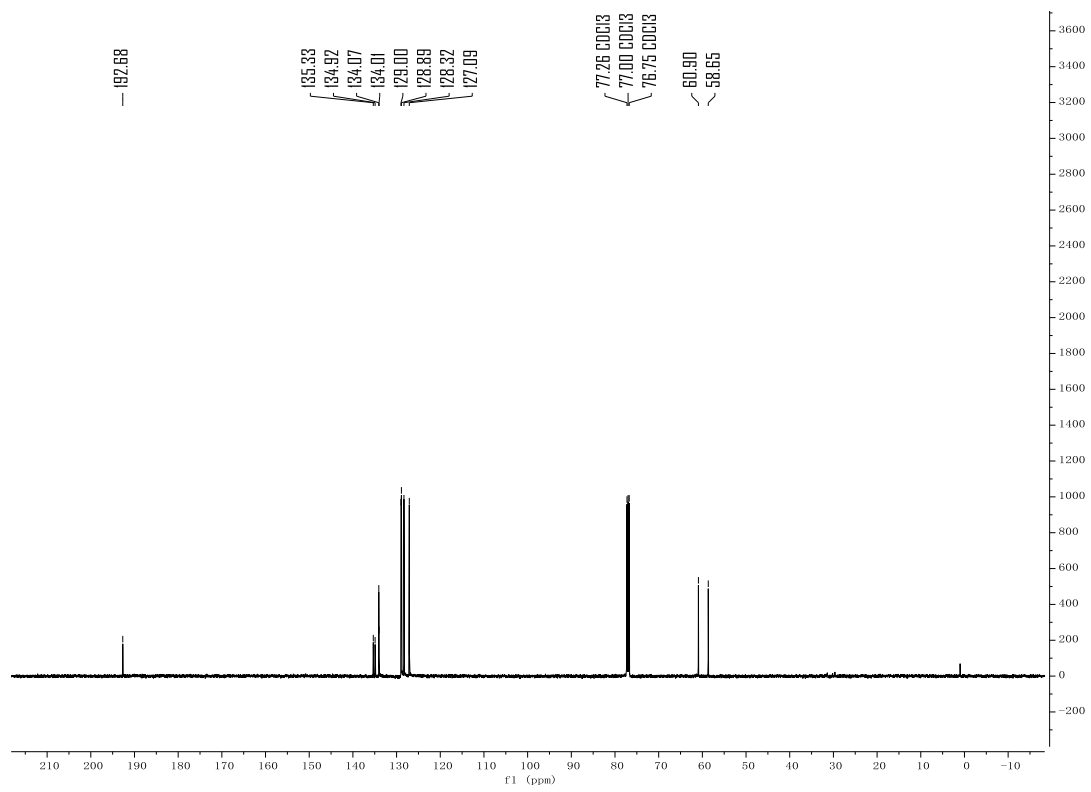

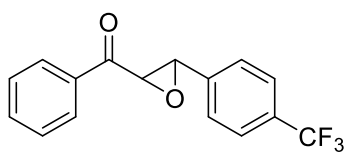

phenyl(3-(4-(trifluoromethyl)phenyl)oxiran-2-yl)methanone (**b14**)

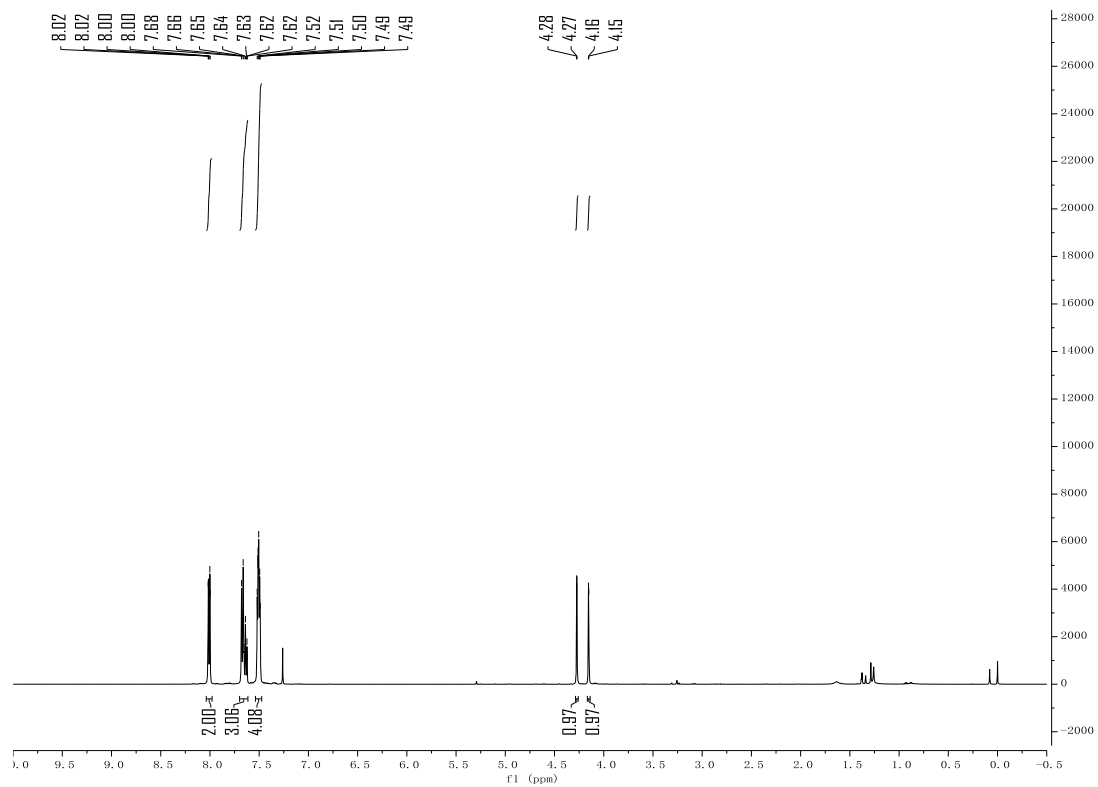



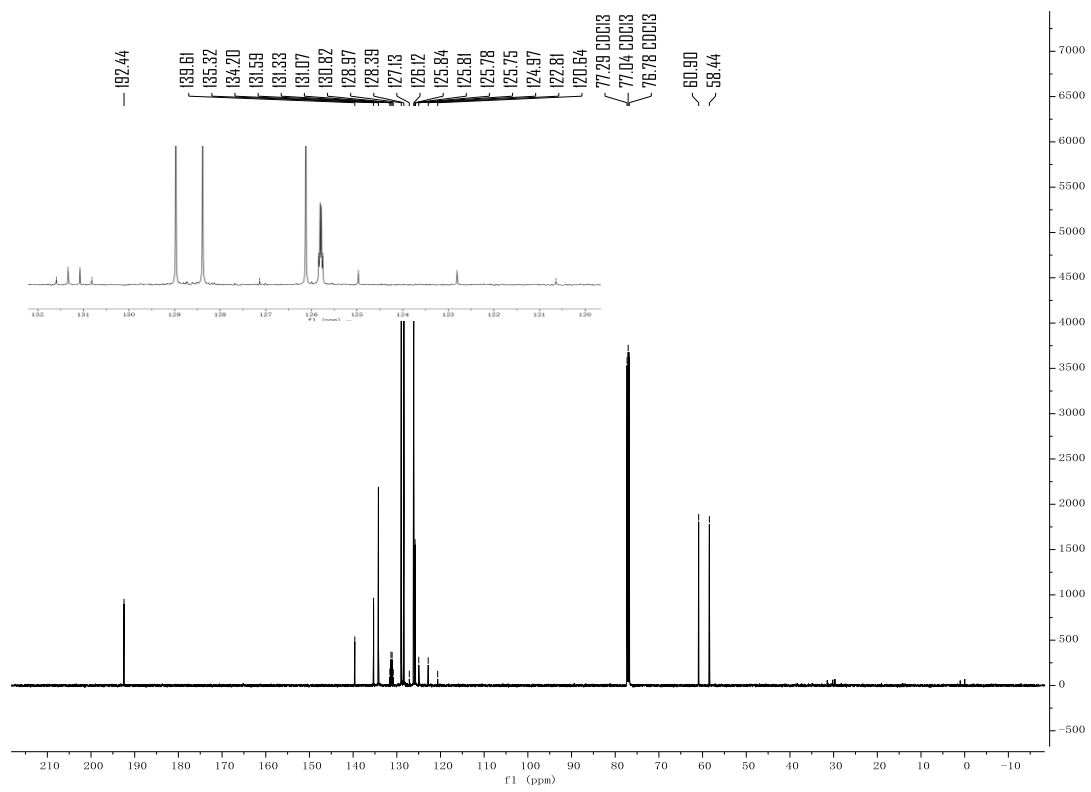

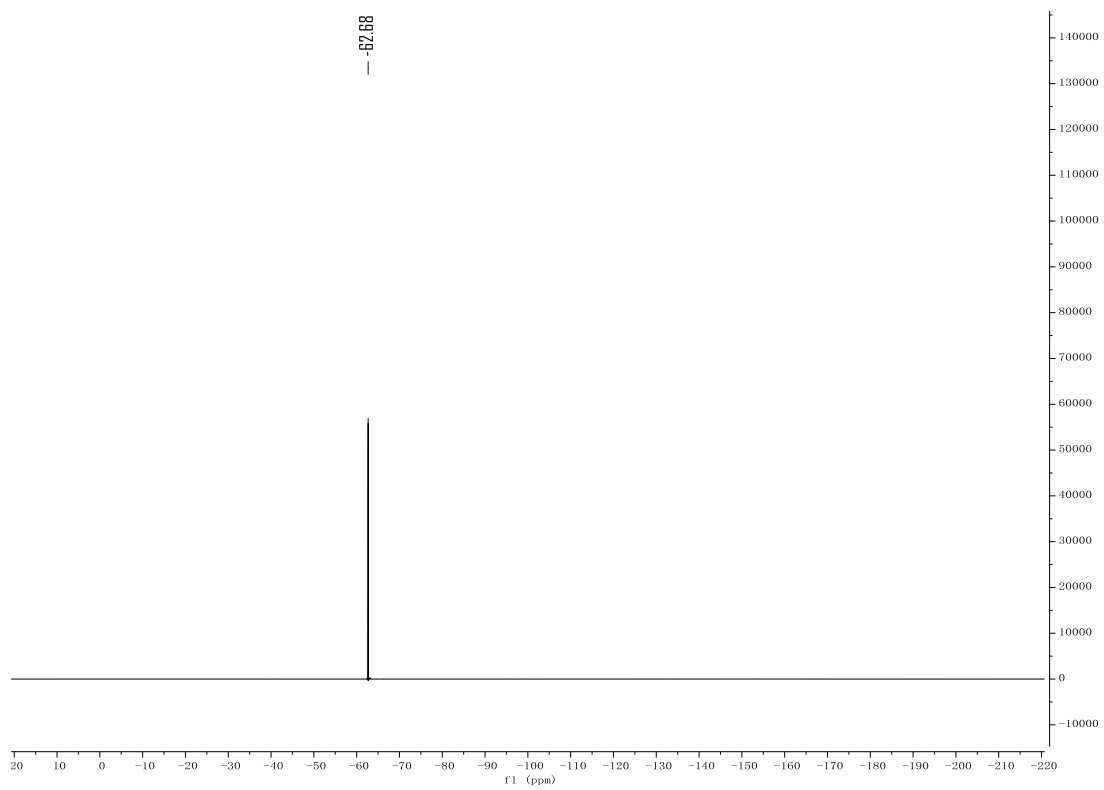

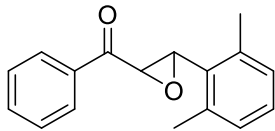

(3-(2,6-dimethylphenyl)oxiran-2-yl)(phenyl)methanone (**b15**)

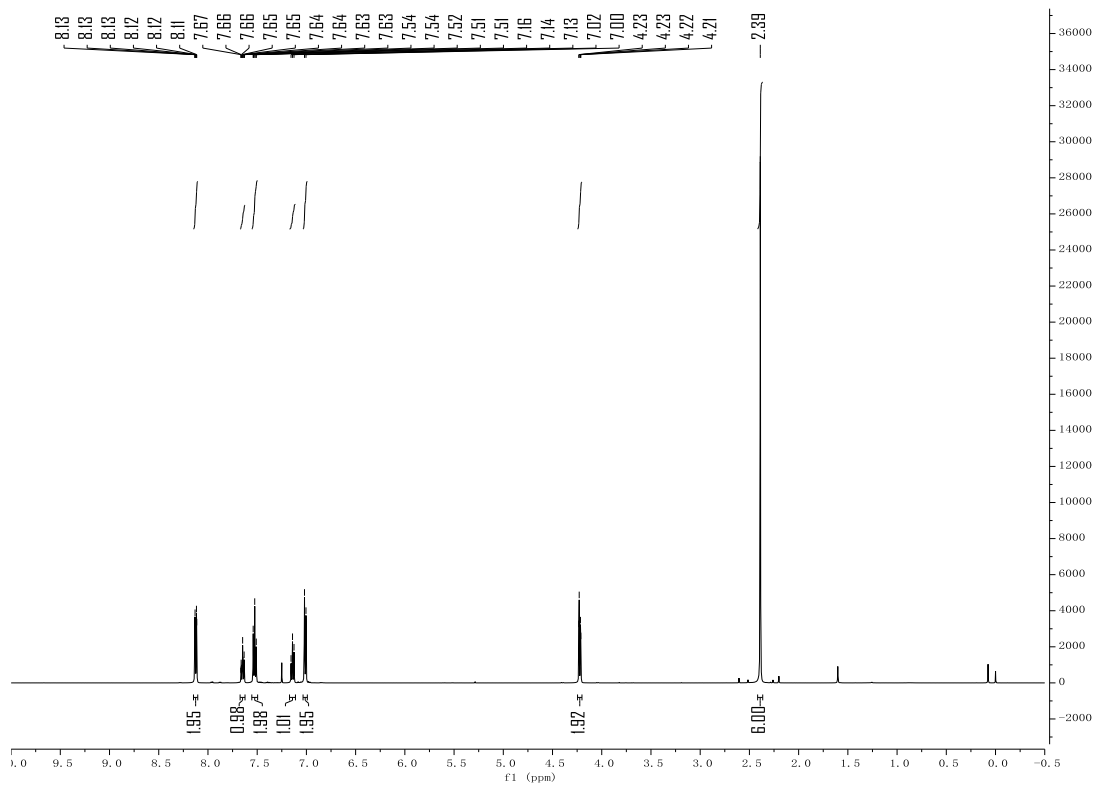

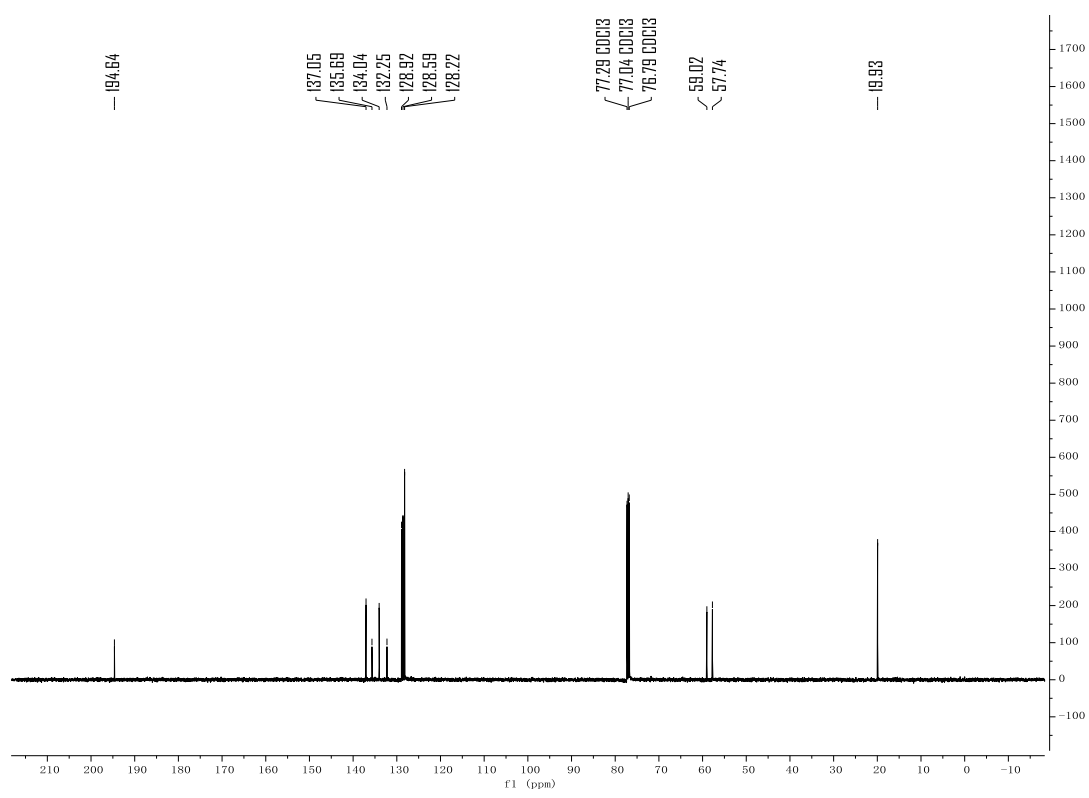

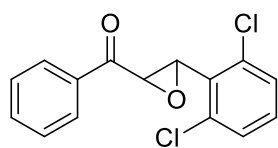

(3-(2,6-dichlorophenyl)oxiran-2-yl)(phenyl)methanone (**b16**)

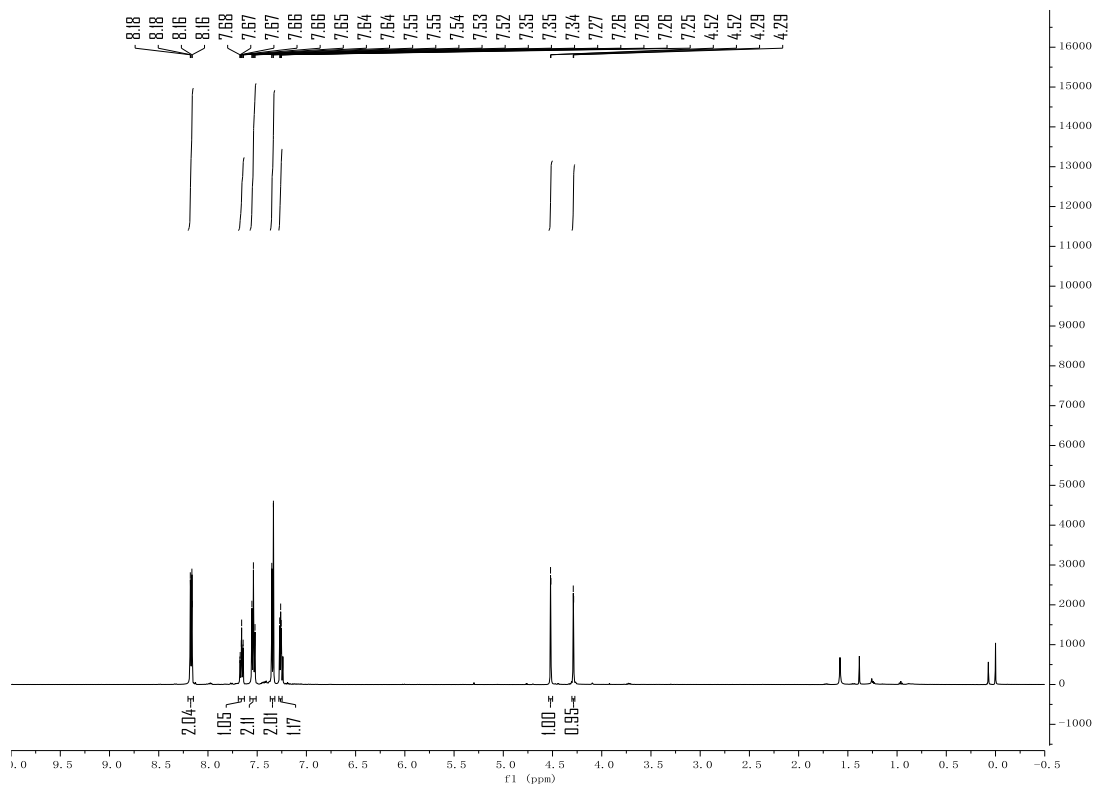

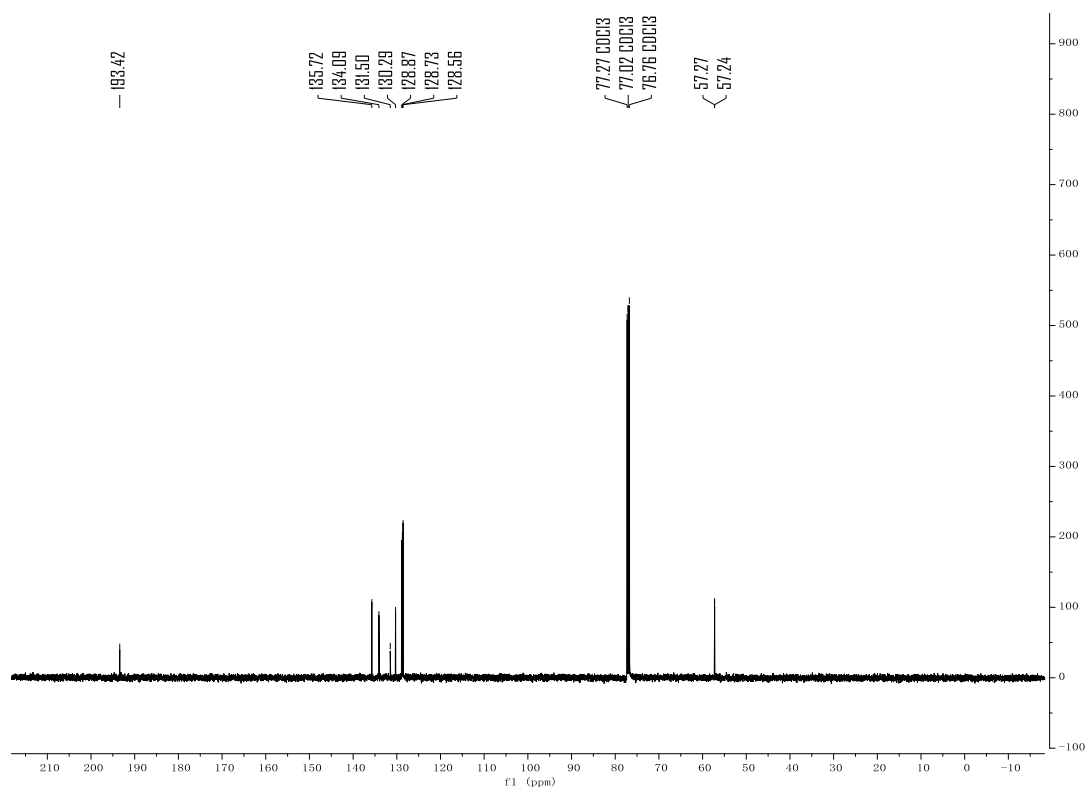

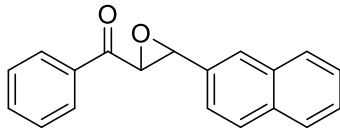

(3-(naphthalen-2-yl)oxiran-2-yl)(phenyl)methanone (**b17**)

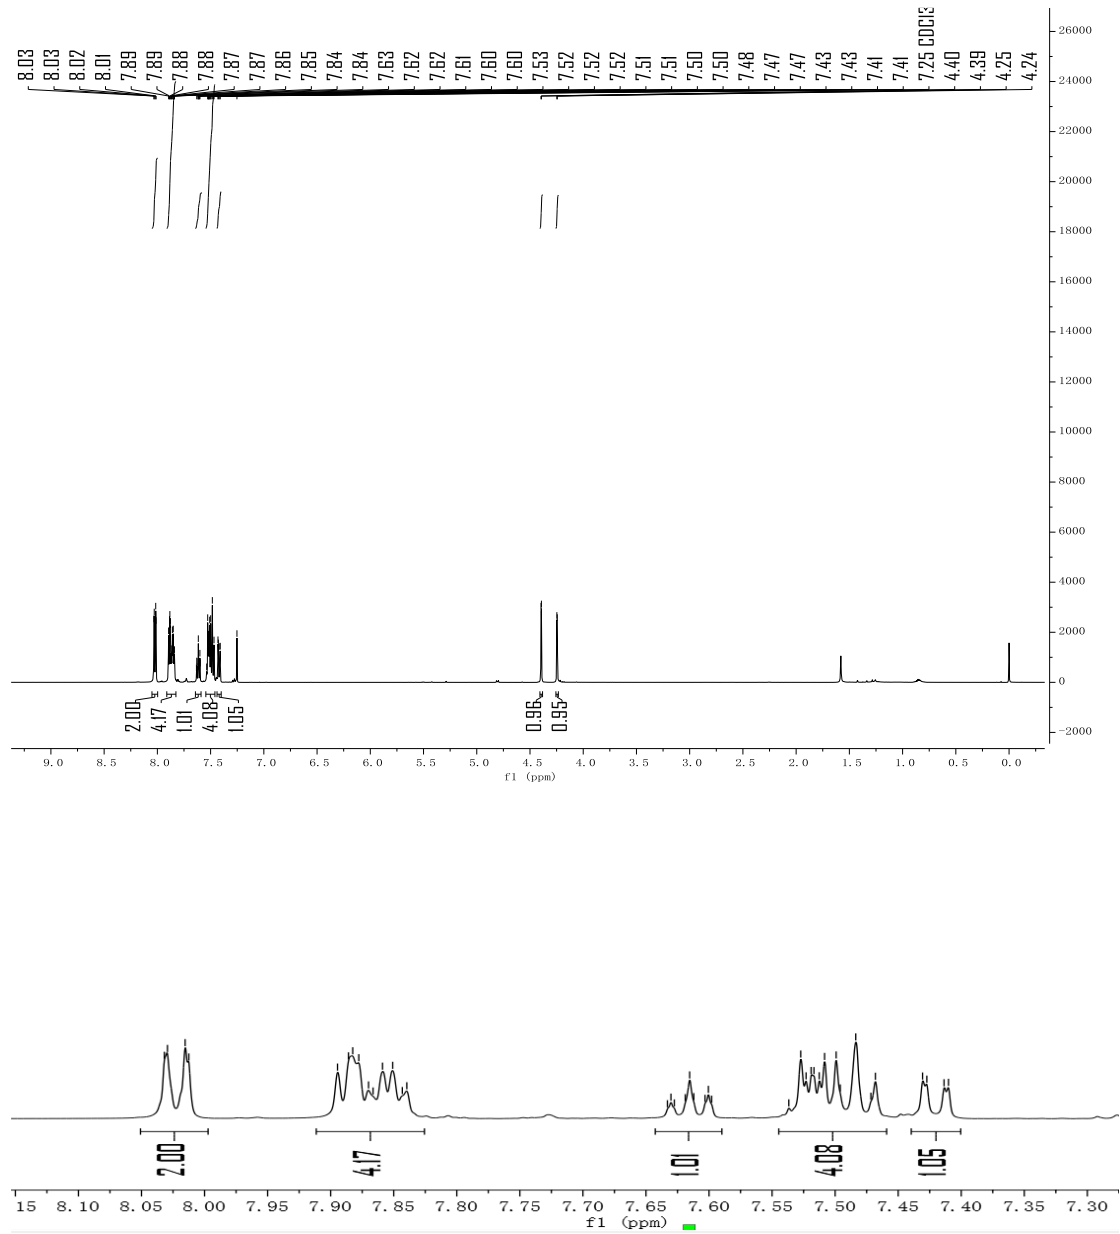

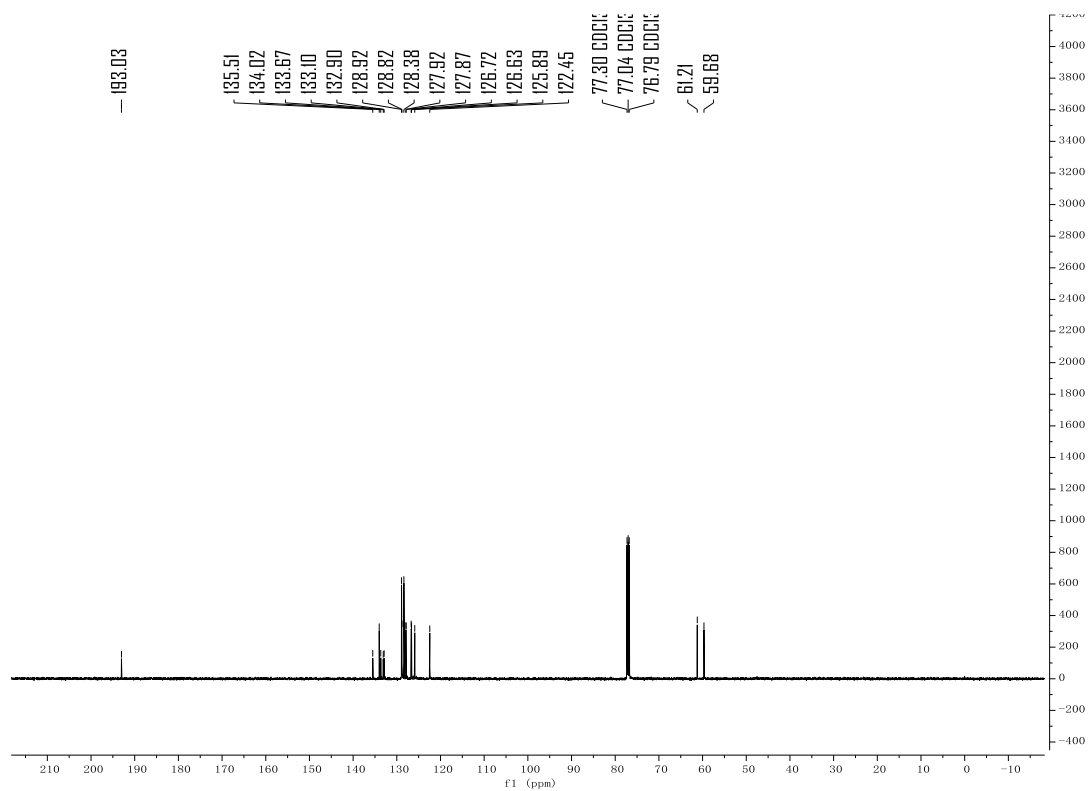



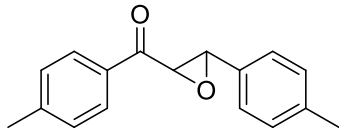

*p*-tolyl(3-(*p*-tolyl)oxiran-2-yl)methanone (**b18**)

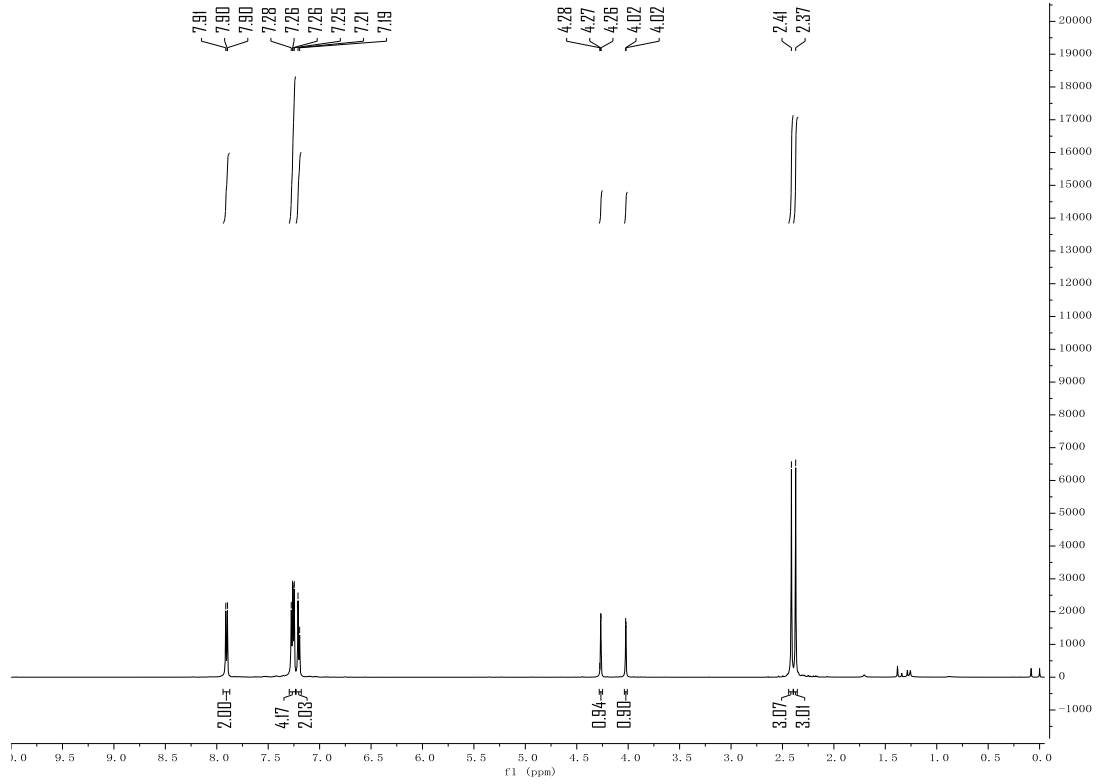

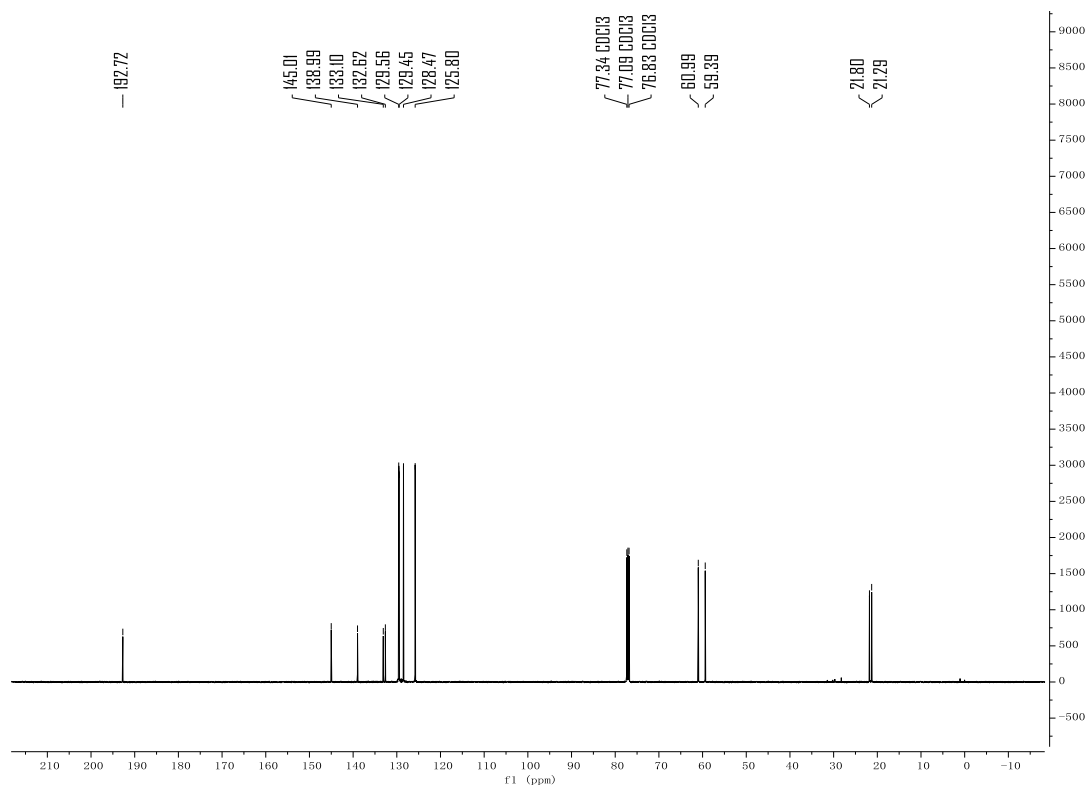

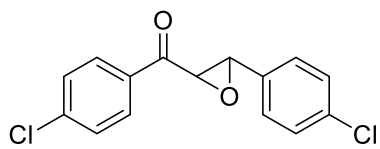

(4-chlorophenyl)(3-(4-chlorophenyl)oxiran-2-yl)methanone (**b19**)

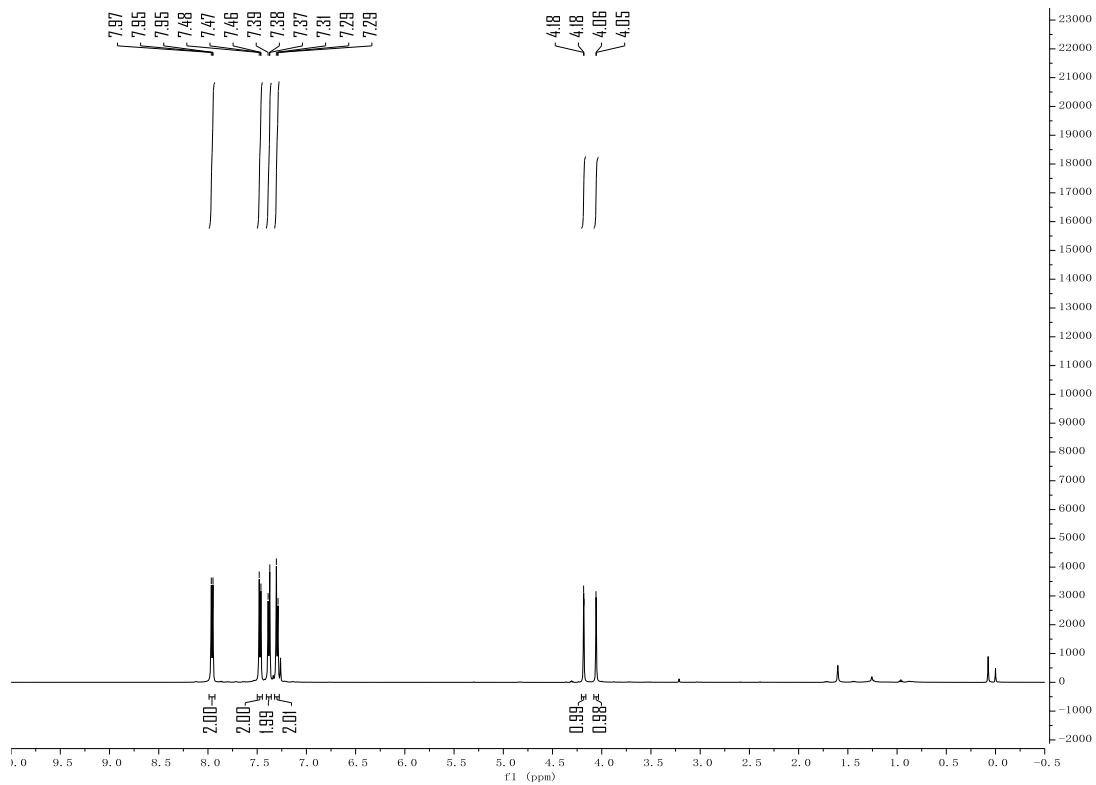

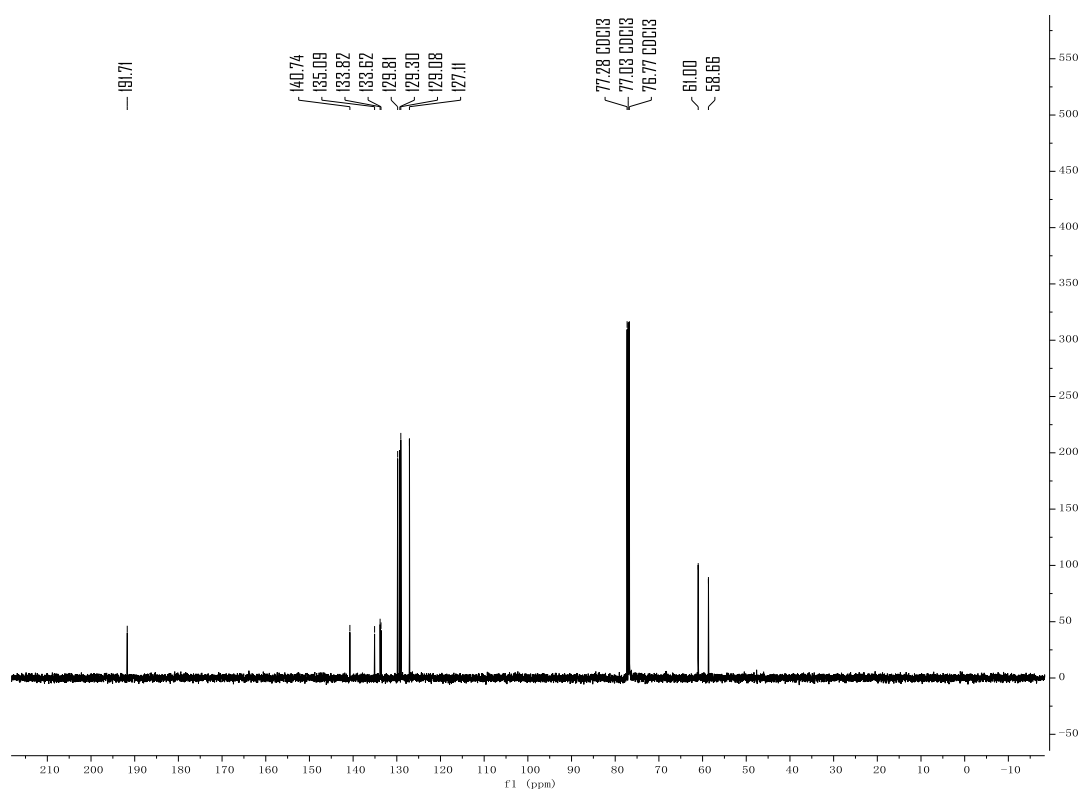

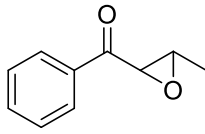

(3-methyloxiran-2-yl)(phenyl)methanone (**b20**)

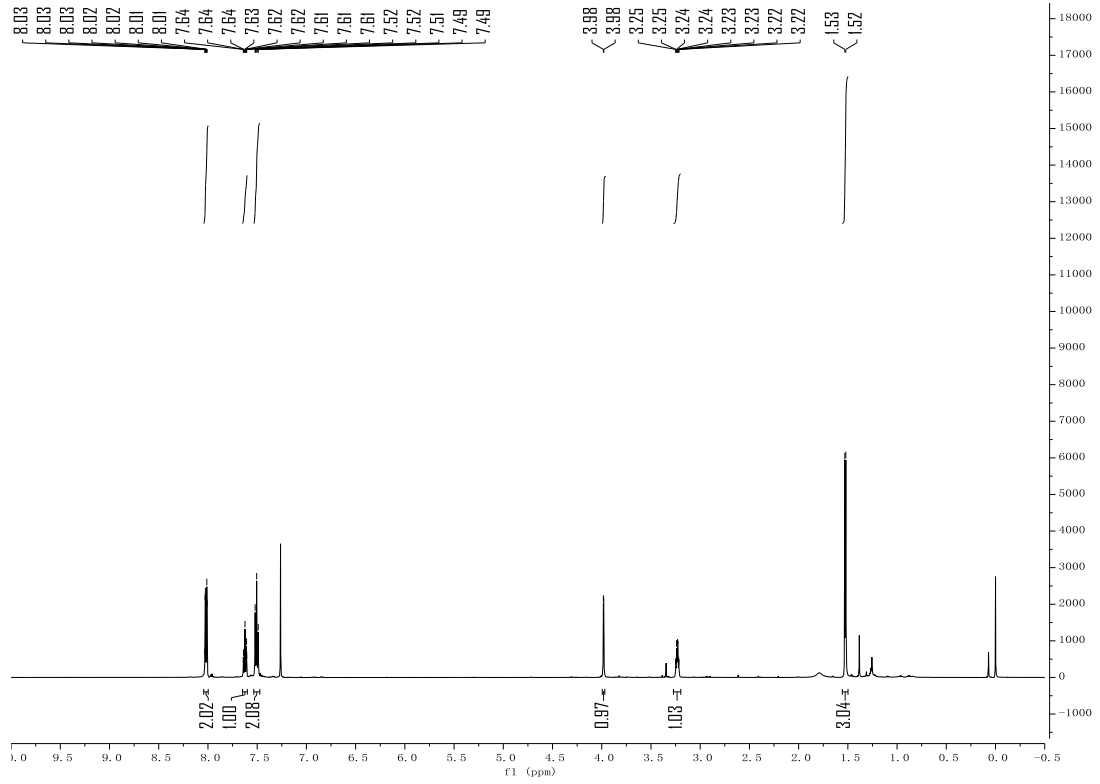

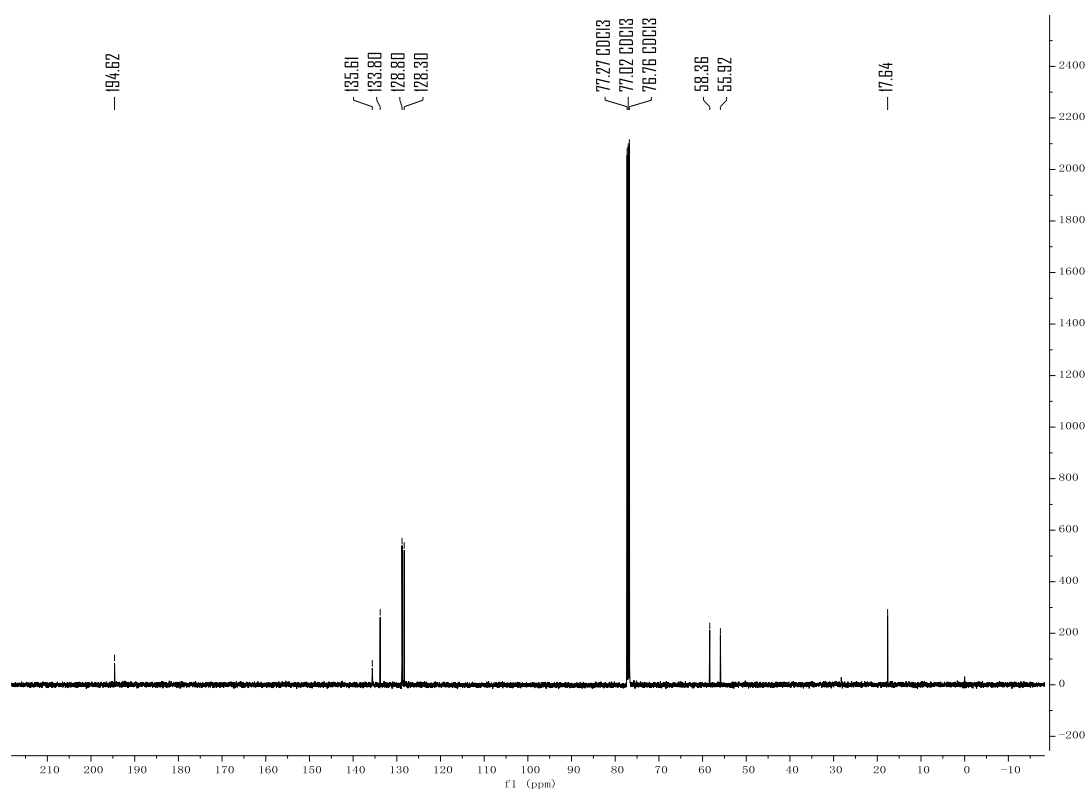

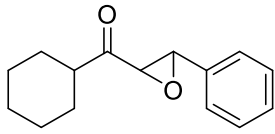

cyclohexyl(3-phenyloxiran-2-yl)methanone (**b21**)

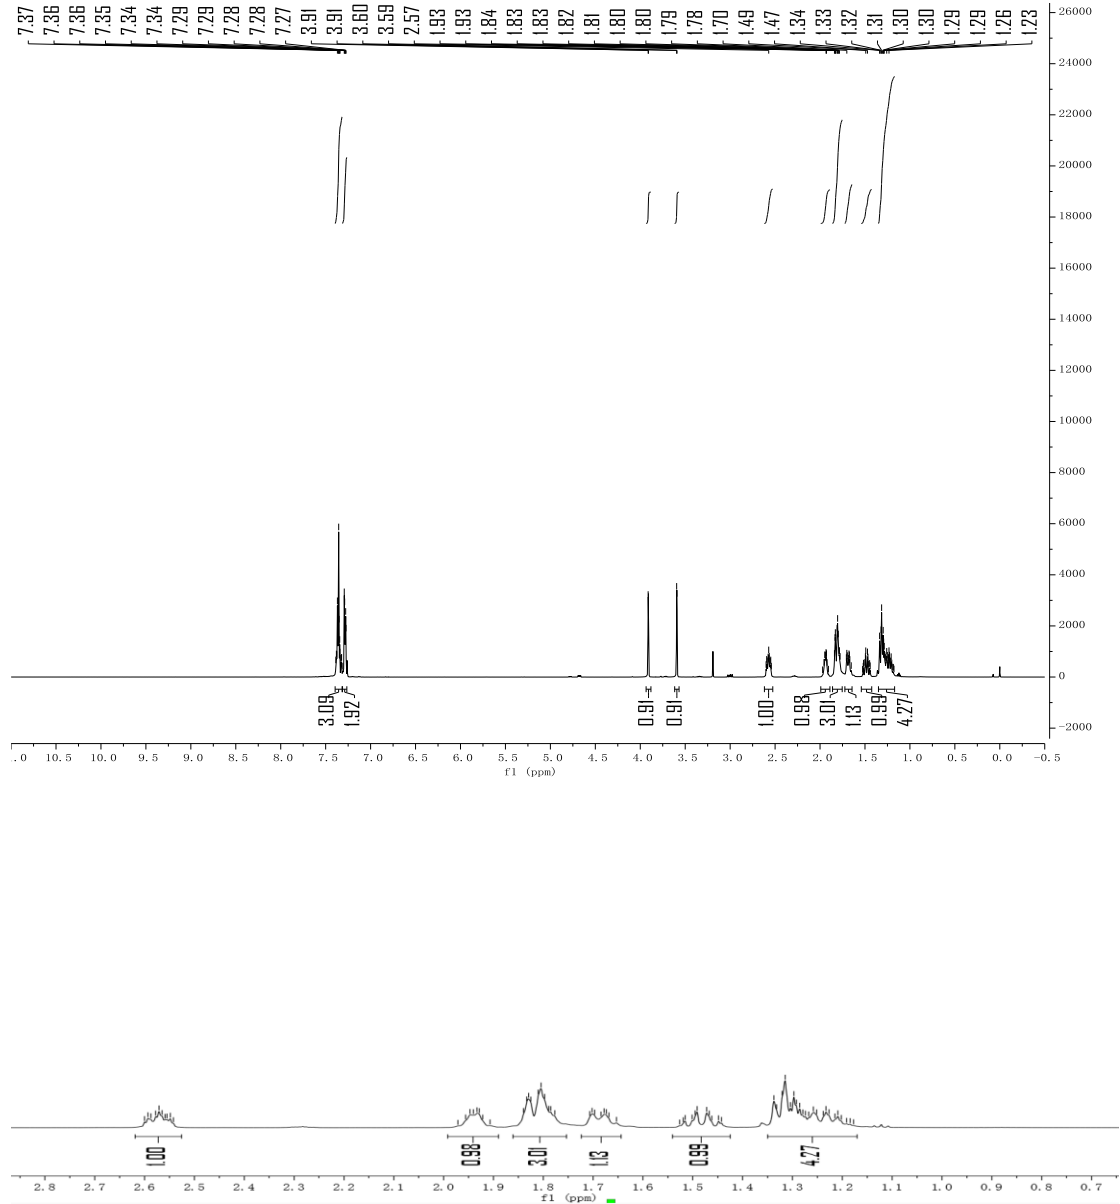

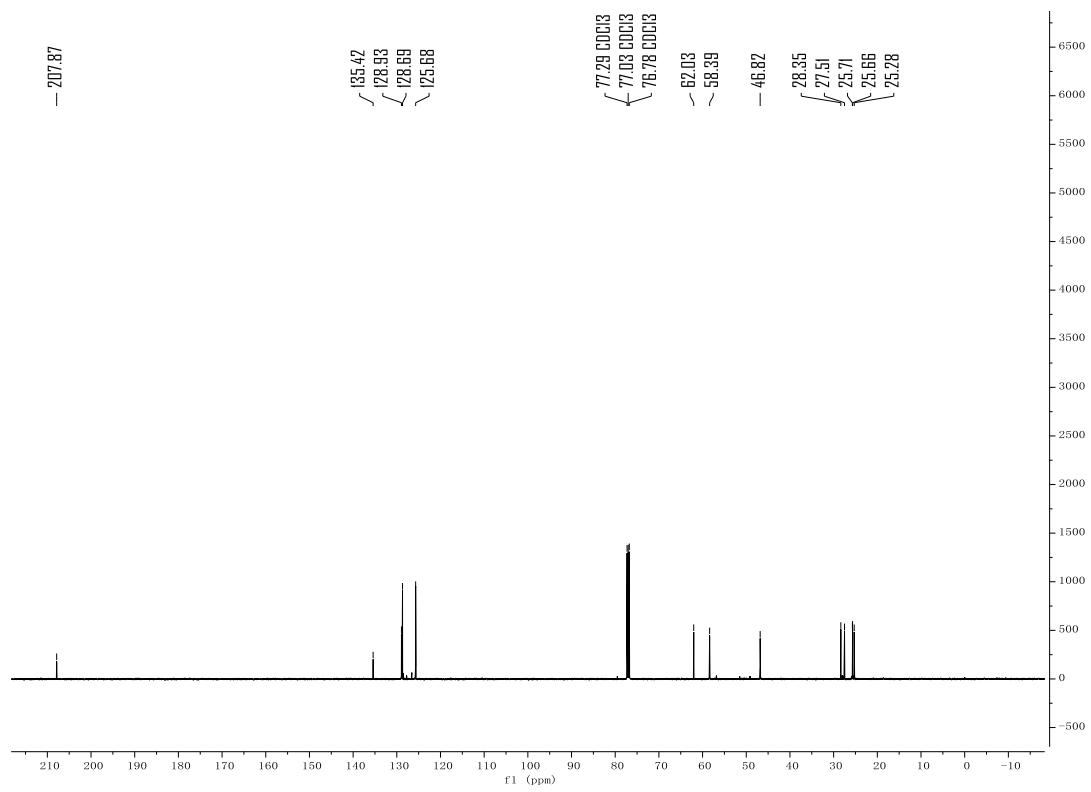



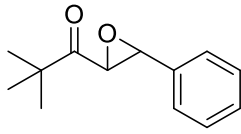

2,2-dimethyl-1-(3-phenyloxiran-2-yl)propan-1-one (**b22**)

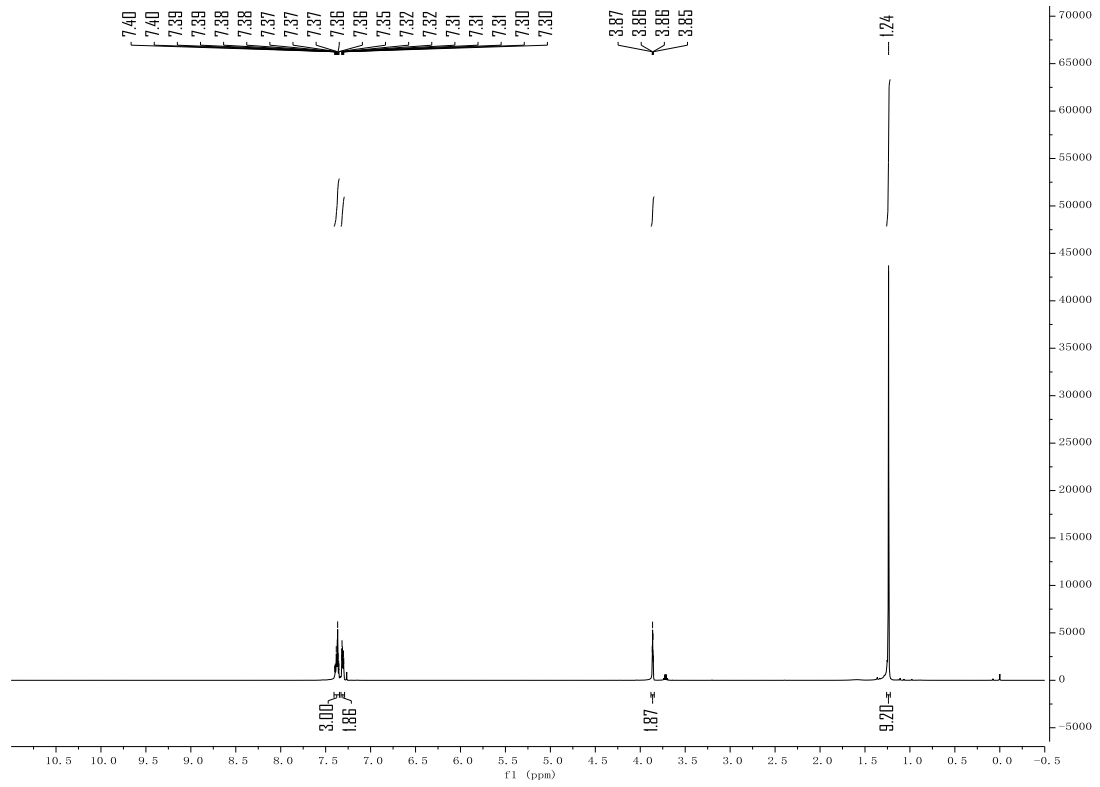

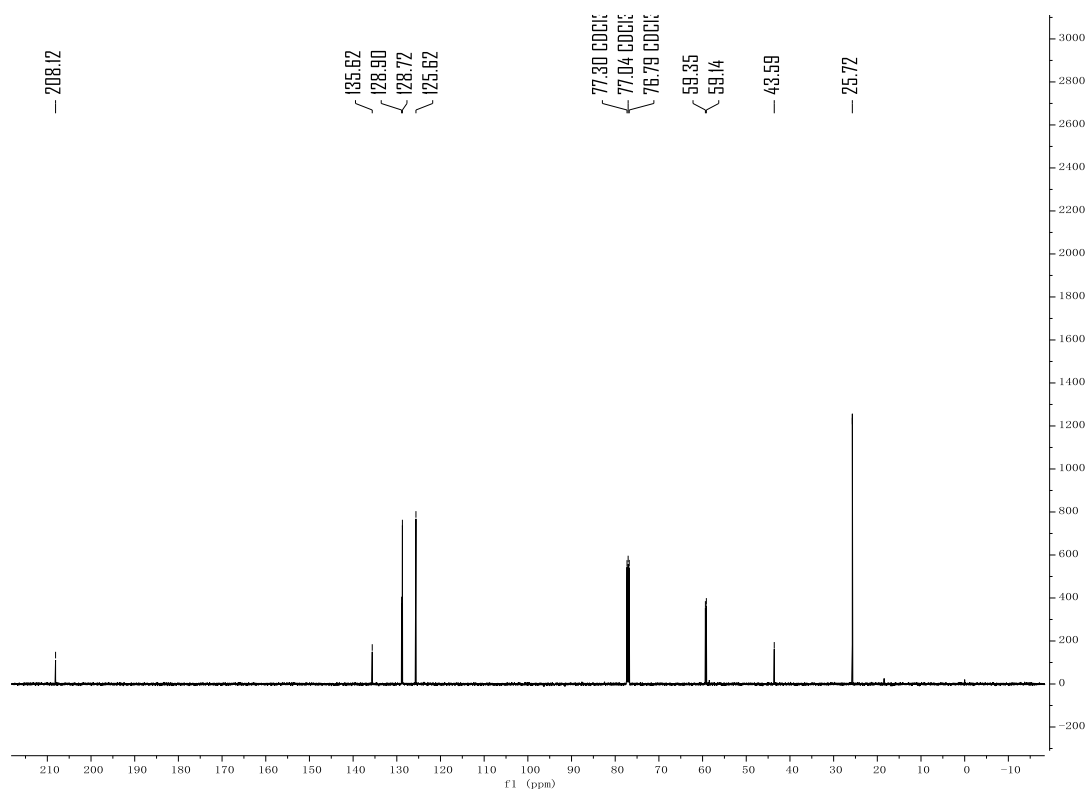

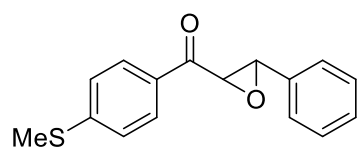

(4-(methylthio)phenyl)(3-phenyloxiran-2-yl)methanone (**b23**)

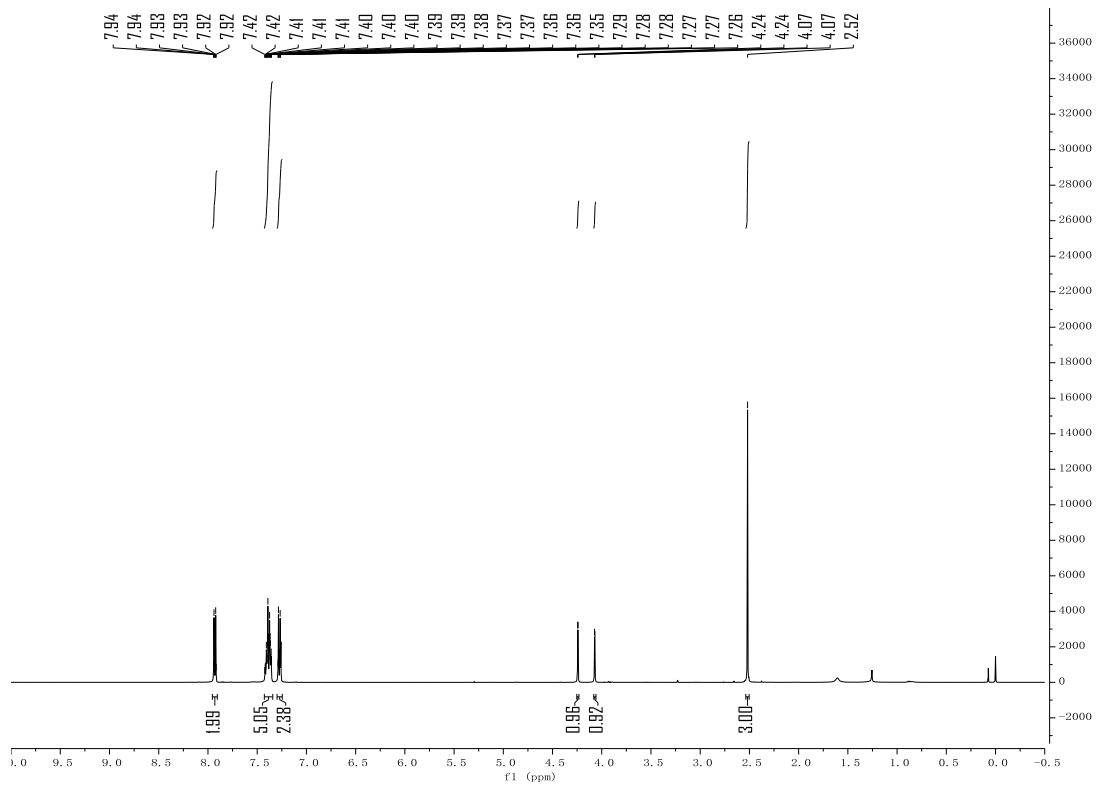

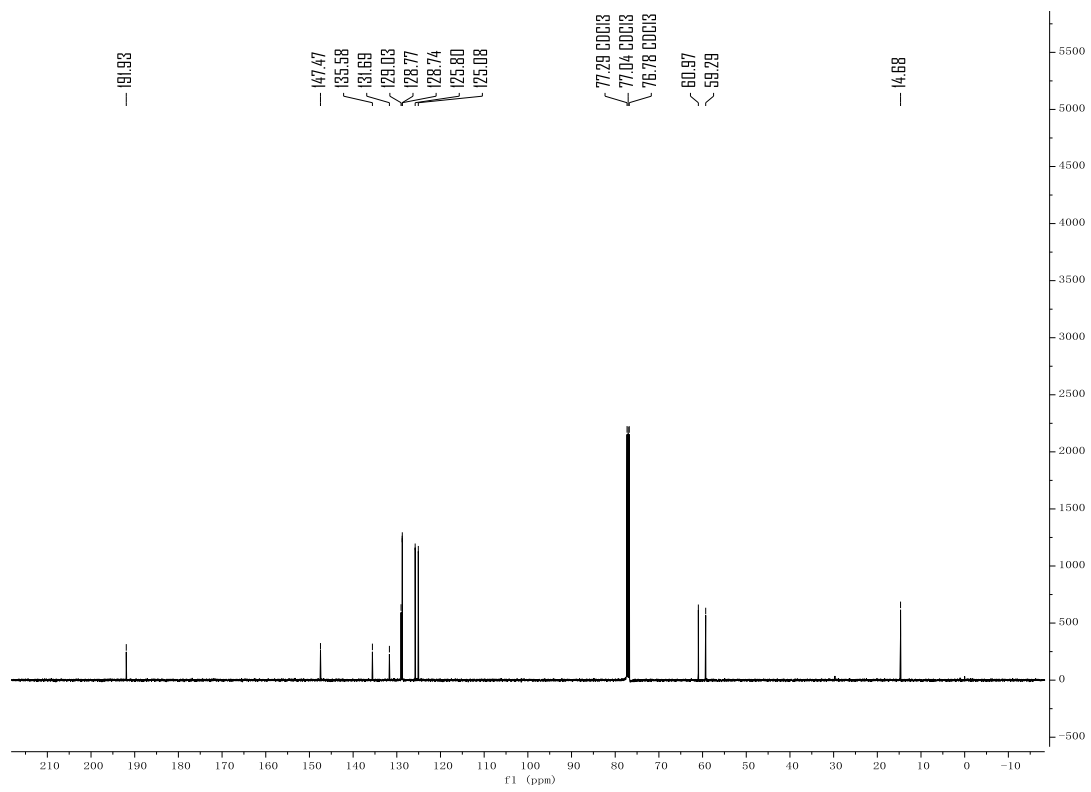

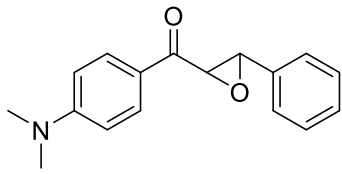

(4-(dimethylamino)phenyl)(3-phenyloxiran-2-yl)methanone (**b24**)

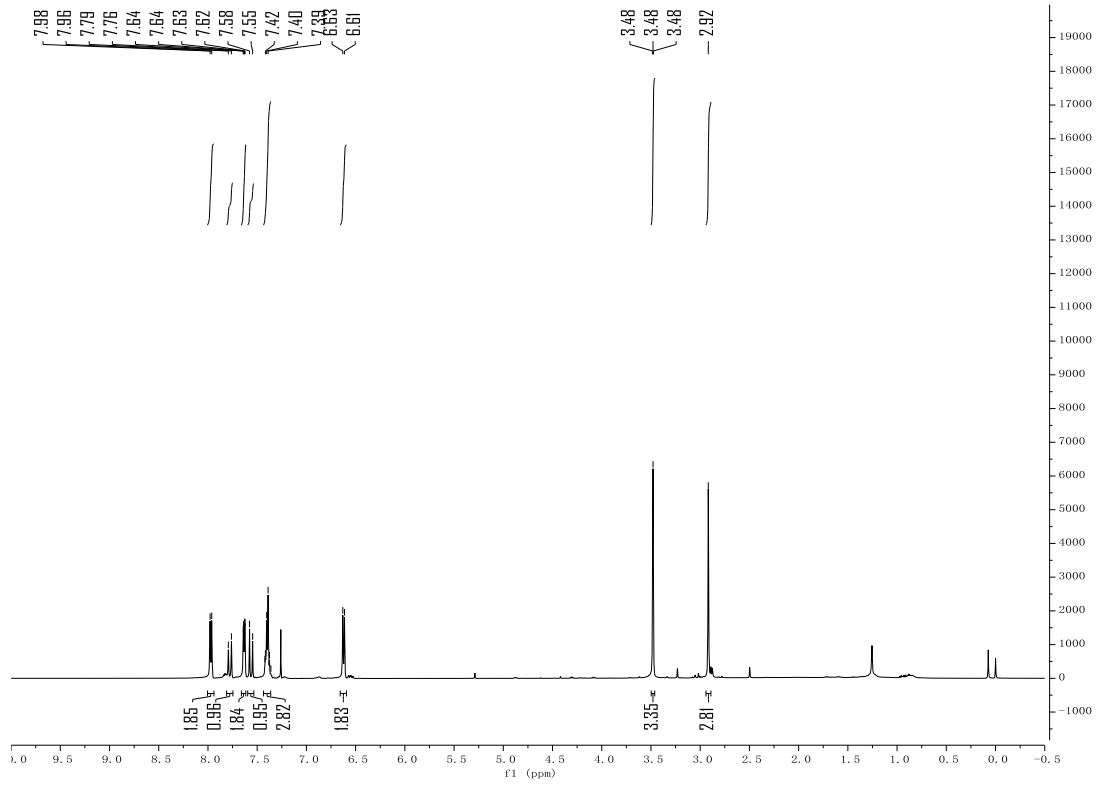

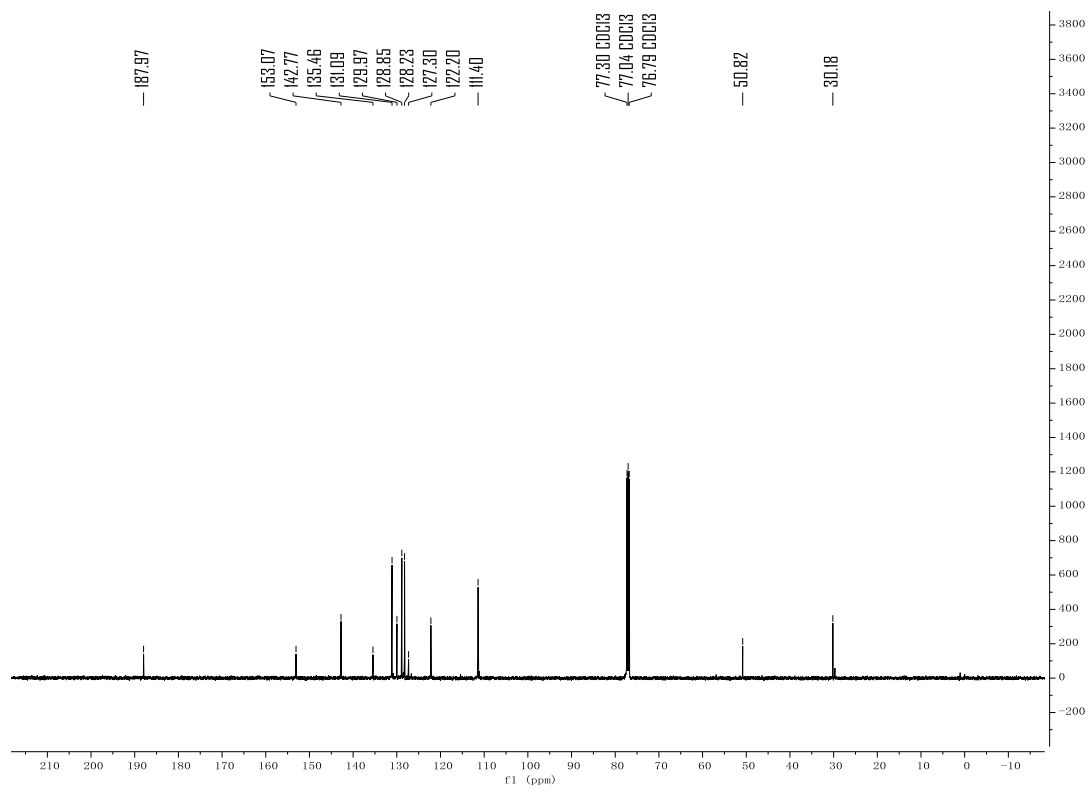

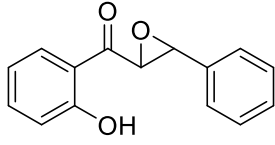

(2-hydroxyphenyl)(3-phenyloxiran-2-yl)methanone (**b25**)

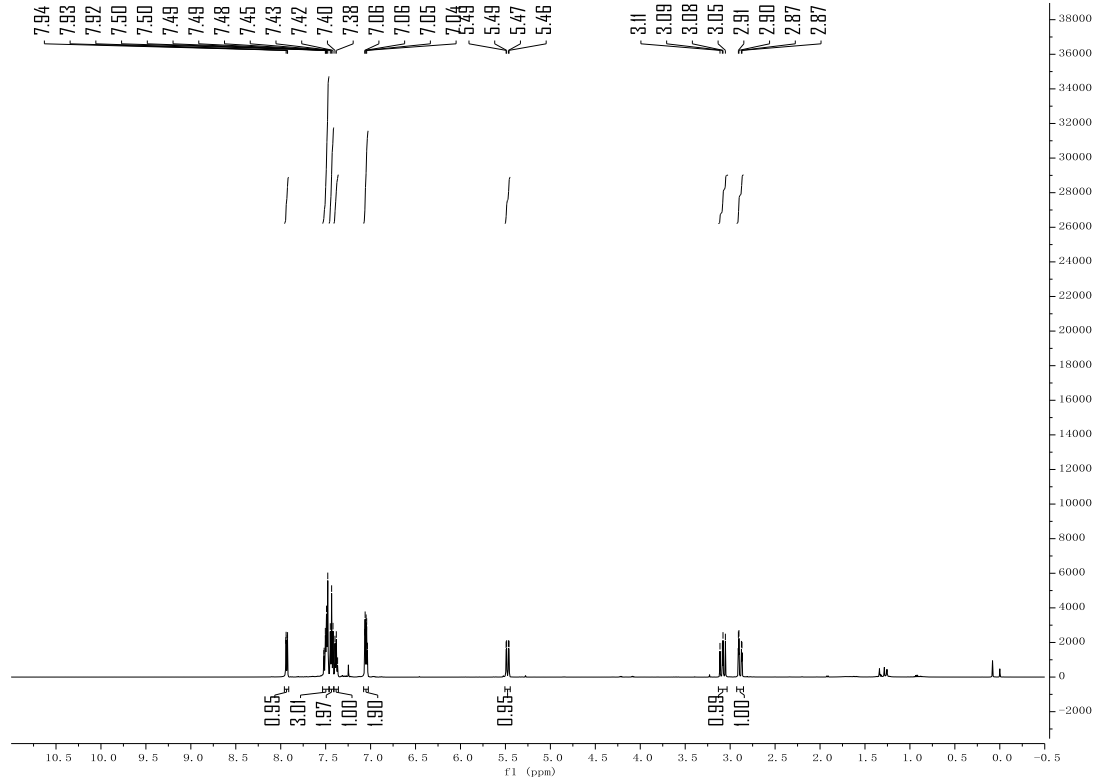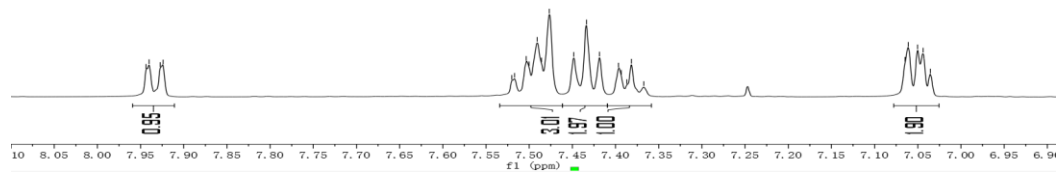

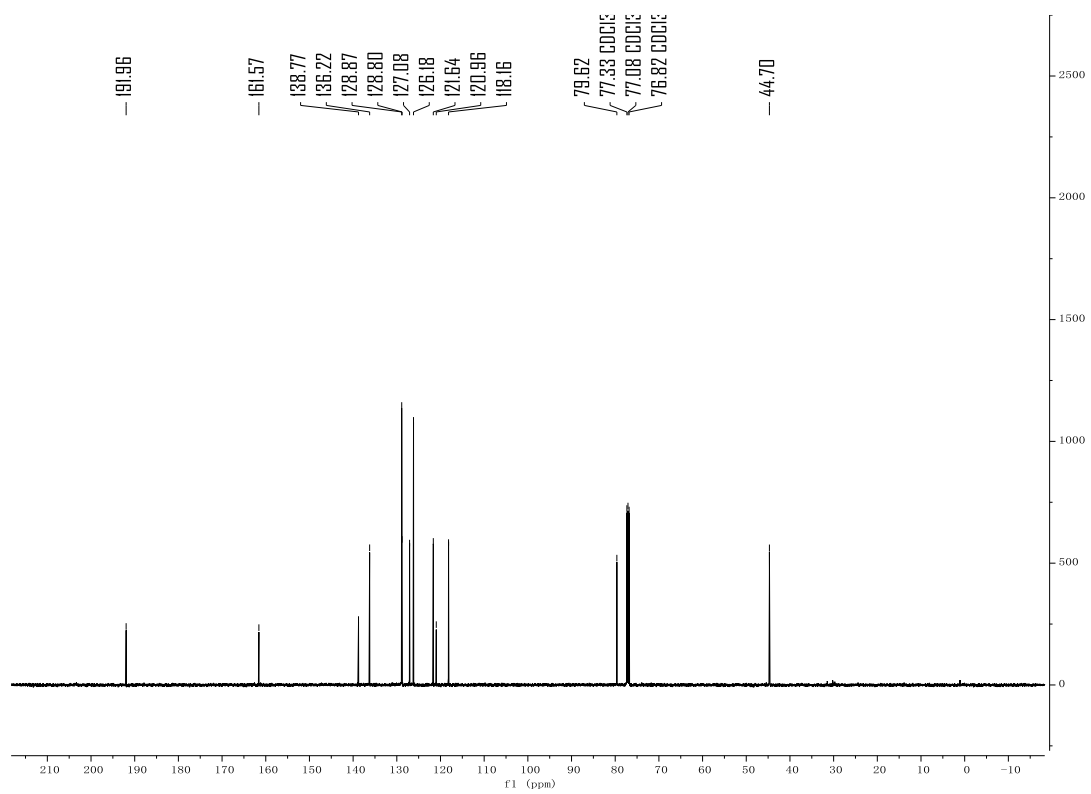



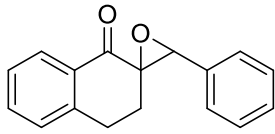

3'-phenyl-3,4-dihydro-1H-spiro[naphthalene-2,2'-oxiran]-1-one (**b26**)

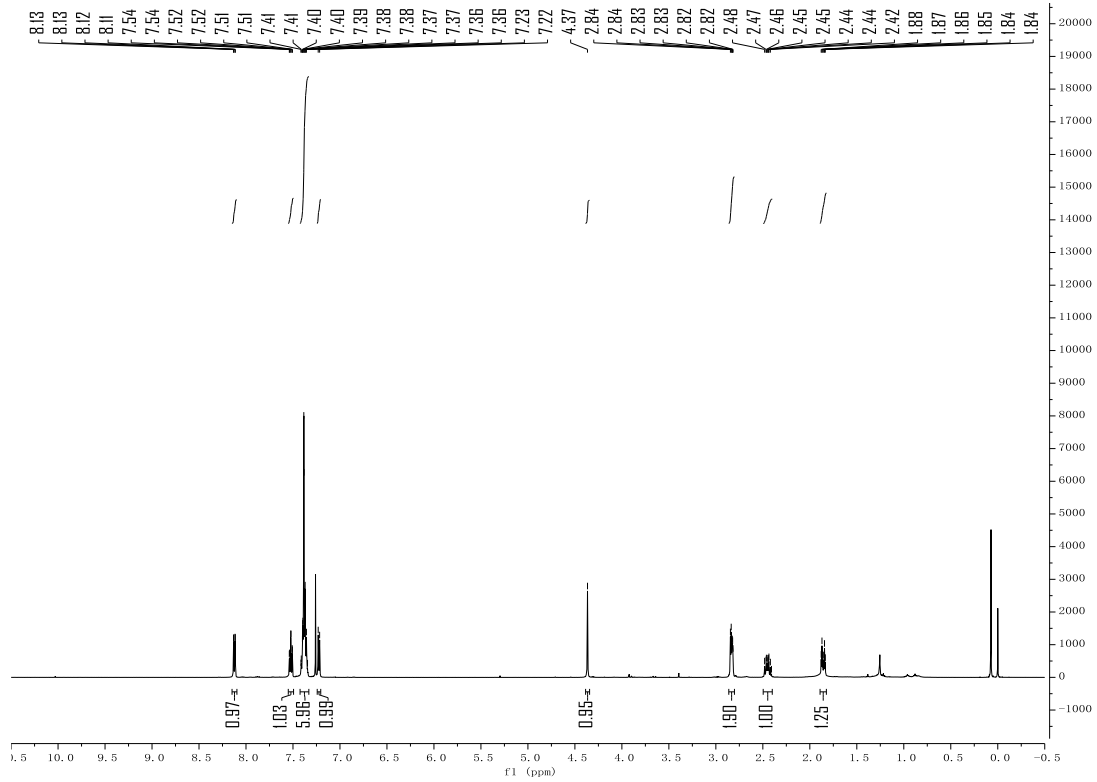

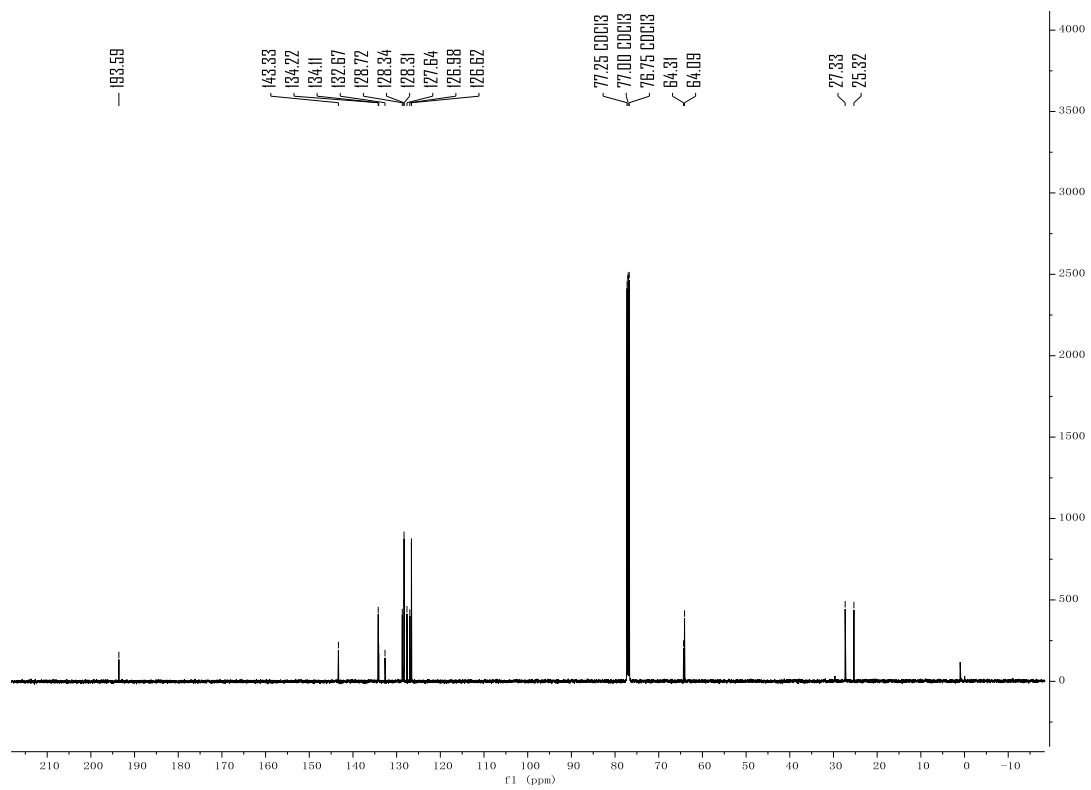

## 8. Supplementary Information of Reaction Scope

In the case of **a23** which contained S-group, except for epoxide **b23**, other two minor unknown compounds were also observed on TLC. However, they disappeared from TLC very soon. They were unlikely to be the products from the oxidation of S, such as sulfone or sulfoxide, because they were highly volatile. For the reaction of **a24**, the corresponding epoxide **b24** was formed as the major product on TLC, but being accompanied by a series of minor impurities which were too difficult to separate. Maybe they were the byproducts from the oxidation of N-group, however, much more efforts were needed to characterize those minor byproducts by other ways in the future.

Meanwhile, other selected  $\alpha,\beta$ -unsaturated substrates were also tested in this catalytic system (see the structures below). The hydrolysis of the ester **aa1** or the amide **aa2** taken place under the alkaline condition to give the corresponding acids, however, no desired epoxides were found after reaction. For the reaction of 1-phenylprop-2-en-1-one (**aa3**), the substrate was quite unstable and became to a mixture of several unknown substances by TLC. In the case of 4-phenylbut-3-en-2-one (**aa4**), no epoxidation occurred in spite of several attempts by adjusting the reaction conditions.

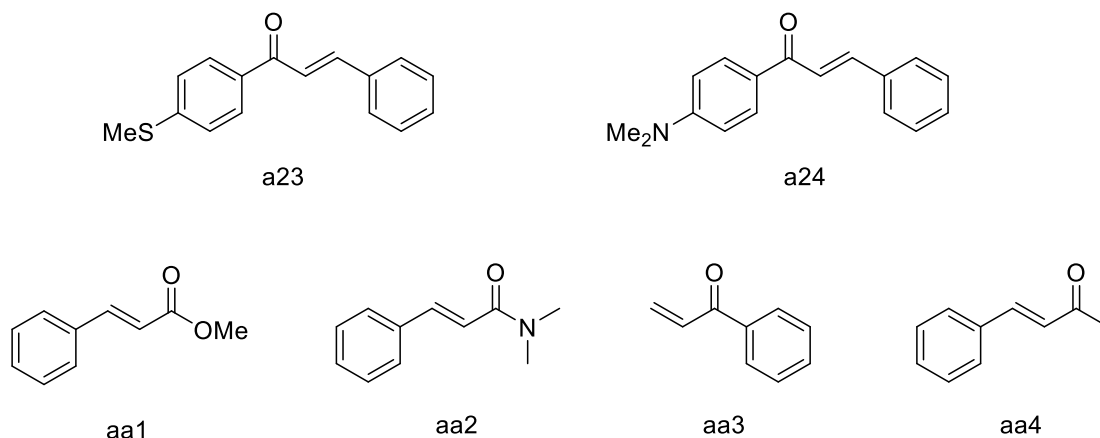

## 9. References

- 1 Y. Wu, G. Zhou, Q. Meng, X. Tang, G. Liu, H. Yin, J. Zhao, F. Yang, Z. Yu and Y. Luo, *J. Org. Chem.*, 2018, **83**, 13051–13062.
- 2 M. Majdecki, A. Tyszka-Gumkowska and J. Jurczak, *Org. Lett.*, 2020, **22**, 8687–8691.
- 3 V. Ashokkumara and A. Siva, *Org. Biomol. Chem.*, 2017, **15**, 2551-2561.
- 4 B. Lygo, S. D. Gardiner, M. C. McLeod and D. C. M. To, *Org. Biomol. Chem.*, 2007, **5**, 2283–2290.
- 5 J. A. Jaszczewska-Adameczaka and J. Mlynarski, *Adv. Synth. Catal.*, 2021, **363**, 4247– 4255.
- 6 Y. Li, Y. Zhang, H.-Y. Zhang, Y.-P. Han and J. Zhao, *Asian J. Org. Chem.*, 2020, **9**, 616-621.
- 7 B. Wang, S. Wang, C. Xia and W. Sun, *Chem. Eur. J.* 2012, **18**, 7332-7335.
- 8 K. Miyamoto, M. Saito, S. Tsuji, T. Takagi, M. Shiro, M. Uchiyama and M. Ochiai, *J. Am. Chem. Soc.*, 2021, **143**, 9327–9331.
- 9 T. Patonay, A. Lévai, C. Nemes, T. Timár, G. Tóth and W. Adam, *J. Org. Chem.*, 1996, **61**, 5375–5383.
